1 **Title**

2 **MafF is an antiviral host factor that suppresses transcription from Hepatitis B Virus**  
3 **core promoter**

4 **Running title**

5 **MafF restricts viral replication**

6 **Authors**

7 Marwa K. Ibrahim<sup>1,2</sup>, Tawfeek H. Abdelhafez<sup>1,2</sup>, Junko S. Takeuchi<sup>1,3,4</sup>, Kosho Wakae<sup>1</sup>,  
8 Masaya Sugiyama<sup>5</sup>, Masataka Tsuge<sup>6</sup>, Masahiko Ito<sup>7</sup>, Koichi Watashi<sup>1</sup>, Mohamed El Kassas<sup>8</sup>,  
9 Takanobu Kato<sup>1</sup>, Asako Murayama<sup>1</sup>, Tetsuro Suzuki<sup>7</sup>, Kazuaki Chayama<sup>9</sup>, Kunitada  
10 Shimotohno<sup>10</sup>, Masamichi Muramatsu<sup>1#</sup>, Hussein H. Aly<sup>1#</sup>, Takaji Wakita<sup>1</sup>

11 **Affiliation**

12 <sup>1</sup>Department of Virology II, National Institute of Infectious Diseases, 1-23-1 Toyama, Shinjuku-ku,  
13 Tokyo 162-8640, Japan

14 <sup>2</sup>Department of Microbial Biotechnology, Division of Genetic Engineering and Biotechnology  
15 Research, National Research Centre, 33 EL Bohouth St. (formerly El Tahrir St.), Dokki, Giza, P. O.  
16 12622, Egypt

17 <sup>3</sup>Center for Clinical Sciences, National Center for Global Health and Medicine, 1-21-1  
18 Toyama Shinjuku-ku, Tokyo 162-8655, Japan

19 <sup>4</sup>Organization for the Strategic Coordination of Research and Intellectual Properties, Meiji  
20 University, 1-1-1, Higashi-Mita, Tama-ku, Kawasaki, Kanagawa 214-8571, Japan

21 <sup>5</sup>Genome Medical Sciences Project, National Center for Global Health and Medicine, 1-7-1 Kohnodai,  
22 Ichikawa, Chiba, 272-8516, Japan

23 <sup>6</sup>Department of Gastroenterology and Metabolism, Graduate School of Biomedical and Health  
24 Science, Hiroshima University, 1-2-3 Kasumi, Minami-ku, Hiroshima, 734-8551, Japan

25 <sup>7</sup>Department of Virology and Parasitology, Hamamatsu University School of Medicine, 1-20-1  
26 Handayama, Higashi-ku, Hamamatsu, Shizuoka, 431-3192, Japan

27 <sup>8</sup>Endemic Medicine Department, Faculty of Medicine, Helwan University, Cairo, P. O. 11795, Egypt

28 <sup>9</sup>Collaborative Research Laboratory of Medical Innovation, Graduate School of Biomedical and  
29 Health Sciences, Hiroshima University, 1-2-3, Kasumi, Minami-ku, Hiroshima-shi,  
30 Hiroshima, 734-8551 Japan

31 <sup>10</sup>Center for Hepatitis and Immunology, National Center for Global Health and Medicine, Chiba 272-  
32 8516, Japan

33 **Corresponding Authors**

34 Hussein H. Aly, email: [ahussein@nih.go.jp](mailto:ahussein@nih.go.jp)

35 Masamichi Muramatsu, email: [muramatsu@nih.go.jp](mailto:muramatsu@nih.go.jp)

36

37 The word count for the abstract: 247 words

38 The word count for the text: 6191 words

39 **Abstract**

40 Hepatitis B Virus (HBV) is a stealth virus that exhibits only minimal induction of the  
41 interferon system that is required for both innate and adaptive immune responses. However,  
42 90% of acutely infected adults can clear the virus, suggesting the presence of additional  
43 mechanisms that facilitate viral clearance. Herein, we report that Maf bZIP transcription  
44 factor F (MafF) promotes host defense against infection with HBV. Using siRNA library and  
45 an HBV/NL reporter virus, we screened to identify anti-HBV host factors. Our data showed  
46 that silencing of *MafF* led to a 6-fold increase in luciferase activity after HBV/NL infection.  
47 Overexpression of MafF reduced HBV core promoter transcriptional activity, which was  
48 relieved upon mutating the putative MafF binding region. Loss of MafF expression by  
49 CRISPR/CAS9 (in HepG2-hNTCP-C4 cells) or siRNA silencing (in primary hepatocytes  
50 [PXB]), induced HBV core and HBV pregenomic RNA (pgRNA) levels, respectively, after  
51 HBV infection. MafF physically binds to HBV core promoter and competitively inhibits  
52 HNF-4 $\alpha$  binding to an overlapping sequence in HBV enhancer II sequence (EnhII) as seen  
53 by ChIP analysis. MafF expression was induced by IL-1 $\beta$ /TNF- $\alpha$  treatment in both HepG2  
54 and PXB cells, in an NF- $\kappa$ B-dependent manner. Consistently, *MafF* expression levels were  
55 significantly enhanced and positively correlated with the levels of these cytokines in patients  
56 with chronic HBV infection, especially in the immune clearance phase.

57

58

59

60

61

62

63 **Importance**

64 HBV is a leading cause of chronic liver diseases, infecting about 250 million people  
65 worldwide. HBV has developed strategies to escape interferon-dependent innate immune  
66 responses. Hence, the identification of other anti-HBV mechanisms is important for  
67 understanding HBV pathogenesis, and developing anti-HBV strategies. MafF was shown to  
68 suppress transcription from HBV core promoter, leading to a significant suppression of HBV  
69 life cycle. Furthermore, MafF expression was induced in chronic HBV patients and in  
70 primary human hepatocytes (PXB). This induction correlated with the levels of inflammatory  
71 cytokines (IL-1 $\beta$  and TNF- $\alpha$ ). These data suggest that the induction of MafF contributes to  
72 the host's antiviral defense by suppressing transcription from selected viral promoters. Our  
73 data shed light on a novel role for MafF as anti-HBV host restriction factor.

74

75

76

77

78

79

80

81

82

83

84

85

86

87

88

89

90

## 91 **Introduction**

92 In the earliest stages of viral infection, the host initially detects and counteracts  
93 infection via induction of innate immune responses (46). Host restriction factors are essential  
94 components of the innate antiviral immune response; these factors serve critical roles in  
95 limiting virus replication before the adaptive immune response engages to promote virus  
96 clearance (5). These antiviral restriction factors are typically induced by cytokines, including  
97 interferons (IFNs) (56), transforming growth factor-beta (TGF- $\beta$ ) (29), and interleukin-1-  
98 beta (IL-1 $\beta$ ) (58). These restriction factors suppress viral replication by targeting the  
99 infection at various stages of the virus life cycle, including viral entry (3), transcription of the  
100 viral genome (67), viral RNA stability (2), translation of viral proteins (33), viral DNA  
101 replication (34), and production of viral particles (6).

102 Approximately 250 million people worldwide are chronically infected with Hepatitis  
103 B virus (HBV). These patients are at high risk of developing life-threatening complications,  
104 including hepatic cirrhosis, hepatic failure, and hepatocellular carcinoma. Current treatments  
105 include nucleos(t)ide analogs that efficiently suppress HBV replication. However, an HBV  
106 replication intermediate, covalently closed circular DNA (cccDNA), persists in the nucleus.  
107 The cccDNA intermediate gives rise to progeny virus, and may lead to the development of  
108 drug-resistant mutants and/or relapsing HBV after drug withdrawal (43). As such, new  
109 strategies for HBV treatment are needed.

110 HBV has been identified in human remains from ~7000 years ago (27). This  
111 prolonged history and evolution has shaped HBV to be one of the most successful of the  
112 “stealth” viruses that can successfully establish infection while evading IFN induction (66).  
113 Although HBV can evade IFN induction, the majority of HBV-infected adults (90%) are  
114 ultimately able to clear the virus. This observation suggests that there are likely to be one or  
115 more IFN-independent host restriction factors that facilitate HBV clearance.

116 The small Maf proteins (sMafs) are a family of basic-region leucine zipper (bZIP)-  
117 type transcription factors. MafF, MafG and MafK are the three sMafs identified in vertebrate  
118 species (24). sMafs lack a transcriptional activation domain hence, they can act as both  
119 transcription activator or repressor based on their expression levels and dimerization partners

120 (19). Intriguingly, previous reports have documented induction of MafF in myometrial cells  
121 by inflammatory cytokines, including IL-1 $\beta$  and tumor necrosis factor alpha (TNF- $\alpha$ ) (32).  
122 However, there have been no previous studies that have addressed a role for MafF in  
123 promoting an antiviral innate immune response.

124 Using an HBV reporter virus and an siRNA library, we performed functional siRNA  
125 screening to identify the host factors that influence the HBV life cycle. Based on the results  
126 of this screen, we identified MafF as a negative regulator of HBV infection. Further analysis  
127 revealed that MafF functions as a repressor of transcription at the HBV core promoter,  
128 thereby suppressing HBV replication. This is the first study to report a role for MafF as an  
129 anti-HBV host factor that represses transcription from the promoters of susceptible viruses.

130

131

132

133

134

135

136

137

138

139

140

141

142

143

144

145

146

147

148

149 **Results**

150

151 **1. MafF suppresses expression of the HBV/NanoLuc (NL) reporter virus**

152 HBV particles carrying a chimeric HBV virus encoding NanoLuc (NL) were prepared as  
153 previously described (45). Since these particles carry a chimeric HBV genome in which HBc  
154 is replaced by NL, the NL levels released after infection with these particles can only detect  
155 the early stages of HBV infection from entry to transcription of HBV-pgRNA (45). We used  
156 this high-throughput system, in combination with druggable genome siRNA Library, to  
157 screen for host factors that influence these early stages. This approach facilitated testing of  
158 2200 human genes for their influence on the HBV life cycle. Screening was performed in  
159 HepG2-C4 cells that express the HBV entry receptor, hNTCP (17). Non-targeting siRNAs,  
160 and siRNAs against hNTCP, were used as controls for each plate (Fig. 1A). Cellular viability  
161 was determined using the XTT assay; wells with  $\geq 20\%$  loss of cell viability were excluded  
162 from further evaluation. NL activity was induced more than 5 folds (average of 3 different  
163 siRNAs) upon the independent silencing of only 10 out of the 2200 host genes (0.4%). These  
164 genes were identified as anti-HBV host factors, and based on the induction level of NL  
165 activity, these genes were classified into 3 groups: Genes in which NL activity ranged from  
166 5 to 10 folds ( $n=6$  genes, MafF fits in this group), from 10 to 20 folds (3 genes), and from 20  
167 to 30 folds induction of NL activity (1 gene) (Fig. 1A). MafF was one of the anti-HBV host  
168 factors identified by this screening. MafF was previously reported to be induced by famous  
169 inflammatory cytokines (IL-1 $\beta$ , and TNF- $\alpha$ ), one of the common criteria of anti-viral host  
170 restriction factors (29, 56, 58), hence we decided to analyze its role on HBV life cycle.  
171 Silencing of *MafF* expression with si-1 or si-3 resulted in 6- ( $p < 0.0001$ ) or 10-fold ( $p <$   
172  $0.001$ ) increases in NL activity, respectively, compared to that observed in cells transfected  
173 with the control siRNA (Fig. 1B). The MafF-specific sequence, si-2, did not show a similar  
174 effect on NL activity (Fig. 1B). This result was consistent with the fact that si-2 had a lower  
175 silencing efficiency for MafF (Fig. 1C). Since NL activity was measured 10 days after siRNA  
176 silencing of *MafF* expression, we measured the MafF protein levels at the designated time in

177 order to confirm the prolonged silencing of *MafF* by si-3 (Fig. 1D). Taken together, these  
178 findings suggest that MafF may suppress HBV infection.

179

## 180 **2. MafF strongly suppresses HBV core promoter activity**

181 The HBV/NL reporter system can be used to detect factors affecting the early steps of the  
182 HBV life cycle, from HBV entry through cccDNA formation, transcription and translation  
183 of HBV-pgRNA (45). Silencing of *MafF* had no impact on cccDNA levels observed in cells  
184 infected with HBV as shown by real-time PCR (Fig. 2A) and by southern blot (Fig. 2B);  
185 these results indicated that MafF suppressed the HBV life cycle at stage that was later than  
186 that of cccDNA formation. Given that MafF can induce transcriptional suppression (19), we  
187 analyzed the impact of MafF on various HBV promoters (core, X, preS1, and preS2) using a  
188 reporter system in which firefly luciferase coding sequence was inserted downstream to the  
189 corresponding HBV promoter. We found that overexpression of MafF resulted in significant  
190 suppression of transcription from the HBV core promoter (approximately 8-fold;  $p<0.0001$ ),  
191 and significant, albeit less of an impact on transcription from the HBV-X and preS1  
192 promoters (both at approximately 2-fold,  $p<0.0001$ ); overexpression of MafF had no  
193 significant impact on transcription from the preS2 promoter (Fig. 2C left panel). Likewise,  
194 siRNA silencing of endogenous *MafF* enhanced HBV core promoter activity (Fig. 2C right  
195 panel,  $p<0.0001$ ). Since the NanoLuc gene in HBV/NL virus (Fig. 1B) is transcribed from  
196 an HBV core promoter (45), the findings presented in Fig. 1 and Fig. 2 collectively suggest  
197 that MafF-mediated suppression of HBV is mediated primarily by inhibition of transcription  
198 from the core promoter.

199

## 200 **3. MafF suppresses HBV replication**

201 The HBV core promoter controls the transcription of the longest two HBV RNA transcripts,  
202 the precore and pgRNAs. HBeAg is translated from the HBV precore RNA, while translation  
203 of HBV-pgRNA generates both the polymerase (Pol) and the capsid subunit; the pgRNA also  
204 serves as the template for HBV-DNA reverse transcription (4, 14). As such, we assumed that  
205 MafF served to inhibit HBV replication by controlling transcription of the HBV core

206 promoter. In fact, overexpression of MafF resulted in significant suppression of the pgRNA  
207 titer of HBV genotypes A (GenBank: AB246338.1) and D (GenBank: V01460.1), as  
208 demonstrated by RT-qPCR (Fig. 3A,  $p < 0.0001$  for each genotype). Overexpression of MafF  
209 also suppressed the release of HBeAg as measured by enzyme-linked immunosorbent assay  
210 (ELISA) (Fig. 3B,  $p < 0.0001$ ), as well as the intracellular accumulation of HBV core protein  
211 as detected by immunoblotting (Fig. 3C upper and lower panels;  $p < 0.05$  by densitometric  
212 analysis) and the level of HBV core-associated DNA as revealed by southern blot (Fig. 3D).  
213

#### 214 **4. MafF-KO induce HBV core protein levels**

215 To further clarify the significance of MafF on HBV infection, we established CRISP/CAS9  
216 MafF-KO HepG2-hNTCP-C4 cells. Out of 11 selected clones, MafF-KO-8 and 11 showed  
217 the best KO phenotype (Fig. 4A). Myrcludex-B is a lipopeptide consisting of amino acid  
218 residues 2–48 of the pre-S1 region of HBV, and is known to block HBV entry [18], pre-  
219 treatment with Myrcludex-B (1  $\mu$ M) 1 hour before infection was performed to confirm that  
220 the detected signals were derived from HBV infection and did not represent non-specific  
221 background(12). Both MafF-KO-8 and 11 showed a higher NL secretion after HBV/NL  
222 infection when compared to parental HepG2-hNTCP-C4 cells with values ranging from 1.5  
223 to 3 folds respectively (Fig. 4B). Accordingly, MafF-KO-11 showed 4 times higher Hbc  
224 levels after HBV infection (Fig. 4C right and left panels). In comparison to the original  
225 HepG2-hNTCP-C4 cells, MafF-KO-11 cells showed similar levels of secreted HBs after  
226 HBV infection (Fig. 4D), which can be explained by the major function of MafF as a  
227 transcriptional repressor of HBV core promoter with minimal to no effect of PreS1 and PreS2  
228 promoters (Fig. 2 B and C).

229

#### 230 **5. MafF binds to the HBV core promoter**

231 MafF is a member of (Maf) family of transcription factors, bZIP-type transcription factors  
232 that bind to DNA at Maf recognition elements (MAREs). MAREs were initially defined as a  
233 13-bp (TGCTGA(G/C)TCAGCA) or 14-bp (TGCTGA(GC/CG)TCAGCA) elements (22,  
234 25). The specificity of this binding sequence is greatly affected by the dimerization partners



235 of MafF; multiple studies have presented findings suggesting heterogeneity within MARE  
236 sequences, especially when MafF heterodimerizes with another bZIP-type transcription  
237 factors (26, 44, 53). We next analyzed the HBV core promoter for putative MafF binding  
238 region using the JASPAR database of transcription factor binding sites (55). Toward this end,  
239 we identified the sequence 5'-TGGACTCTCAGCG-3' that corresponded to nucleotides (nts)  
240 1667 to 1679 of the HBV-C\_JPNAT genome (GenBank AB246345.1) in the enhancer 2  
241 (EnhII) of the HBV core promoter. This motif shared a similarity to a previously defined Maf  
242 responsive element (MARE) (19) and also with the DNA binding site for other cap'n'collar  
243 (CNC) family proteins Nrf1, Nrf2, Bach1 (Jaspar matrix profiles, MA0506.1, MA0150.1,  
244 and MA0591.1, respectively), and bZIP transcription factors that are reported to  
245 heterodimerize with sMafs (Fig. 5A). As such, we evaluated the role of this predicted  
246 MafF/bZIP site with respect to HBV core promoter activity. We found that the 9<sup>th</sup> and 11<sup>th</sup>  
247 nucleotides of the aforementioned predicted MafF binding region, which are A and C,  
248 respectively, are highly conserved common residues in the predicted MafF/bZIP binding  
249 sequence (Fig. 5A). We disrupted this predicted MafF/bZIP site by introducing 2-point  
250 mutations (A1676C and C1678A) into the HBV core promoter (Fig. 5A). Despite a minimal  
251 but statistically significant reduction of HBV core promoter activity induced by the  
252 introduction of these mutations (Fig. 5B left panel,  $p < 0.0001$ ), MafF overexpression  
253 suppressed the wild-type (WT) core promoter 2–3 times more than that carrying mutations  
254 (A1676C and C1678A) (Fig. 5B right panel,  $p < 0.0001$ ). Furthermore, CHIP analysis revealed  
255 that there was significantly less physical interaction between MafF and the HBV core  
256 promoter with A1676C and C1678A mutations than was observed between MafF and the  
257 HBV WT counterparts (Fig. 5C,  $p < 0.05$  for % of input and  $p < 0.01$  for fold enrichment).  
258 These results confirmed that MafF physically binds to the WT HBV core promoter at the  
259 putative MafF/bZIP binding region and thereby suppresses transcription. Interestingly the 5'  
260 end of the identified MafF/bZIP binding region in HBV core promoter showed high  
261 conservation in all HBV genotypes, including ancient HBVs from the Bronze age to the early  
262 modern age (appx. 4,500 - 250 years ago), while 3' end showed a relatively less conservation  
263 in HBV genotypes A to E, with more sequence divergence in new world HBV genotypes F,

264 G and H (Fig. 5D). The role of these mutations in the escape from MafF-mediated  
265 transcriptional repression in these genotypes needs to be further analyzed.

266

267 **6. MafF is a competitive inhibitor of hepatocyte nuclear factor (HNF)-4 $\alpha$  binding to**  
268 **HBV EnhII**

269 HNF-4 $\alpha$  is a transcription factor that has been previously reported to bind HBV core  
270 promoter and to induce its transcriptional activity (31, 52, 69). We found that the predicted  
271 MafF/bZIP binding region in the EnhII overlaps at its conserved 5' region with an HNF-  
272 4 $\alpha$  binding site that is located between nucleotides 1662 to 1674 of the HBV C\_JPNAT core  
273 promoter (10) (Fig. 6A). This finding suggests the possibility that MafF may compete with  
274 HNF-4 $\alpha$  at these binding sites within the EnhII region. To examine this possibility, we  
275 constructed a deletion mutant of EnhII/Cp (EnhII/Cp $\Delta$ HNF-4 $\alpha$ #2) that extends from nt 1591  
276 to nt 1750; this construct includes the overlapping binding regions identified for MafF and  
277 HNF-4 $\alpha$  (i.e., HNF-4 $\alpha$  site #1 at nt 1662–1674) but lacks the second HNF-4 $\alpha$  binding site  
278 (HNF-4 $\alpha$  site #2 at nt 1757–1769) as shown in Fig. 6A. We performed a ChIP assay and  
279 found that the interaction between HNF-4 $\alpha$  and EnhII/Cp $\Delta$ HNF-4 $\alpha$  #2 was significantly  
280 reduced in the presence of MafF (Fig. 6B,  $p < 0.01$  for % of input and  $p < 0.05$  for fold  
281 enrichment). Furthermore, MafF had no impact on the expression of HNF-4 $\alpha$  (Fig. 6C).  
282 Together, these data indicated that MafF interacts directly with the HBV core promoter at the  
283 putative binding region and suppresses the transcriptional activity of the HBV core promoter  
284 by competitive inhibition of HNF-4 $\alpha$  binding at an overlapping site in the EnhII region. This  
285 competitive suppression is due to partial overlapping of HNF4- $\alpha$  and the putative MafF  
286 binding regions in HBV core promoter and did not affect other host genes like ApoA1 and  
287 HNF1A known to be regulated by HNF-4 $\alpha$  (37, 63) (Fig. 6D).

288

289 **7. IL-1 $\beta$  and TNF- $\alpha$ -mediated induction of MafF expression *in vitro***

290 Given these findings, we speculated that MafF expression might be induced in hepatocytes  
291 in response to HBV infection. Based on a previous report of the induction of MafF by both

292 IL-1 $\beta$  and TNF- $\alpha$  in myometrial cells (32), and the fact that both of these cytokines have  
293 been implicated in promoting host defense against HBV, we explored the possibility that  
294 MafF might be induced by one or more of these cytokines in our *in vitro* system. As shown  
295 in Fig. 7, addition of IL-1 $\beta$  or TNF- $\alpha$  resulted in significant induction of *MafF* mRNA  
296 expression in HepG2 cells (Fig. 7A,  $p < 0.0001$  for each cytokine); MafF protein was also  
297 detected at higher levels in HepG2 cells exposed to each of these cytokines (Fig. 7B). NF-  
298  $\kappa$ B is a downstream regulatory factor that is shared by the IL-1 $\beta$  and TNF- $\alpha$  signaling  
299 pathways. We found that chemical inhibition of NF- $\kappa$ B activity with Bay11-7082 or BMS-  
300 3455415 suppressed the induction of *MafF* expression in response to IL-1 $\beta$  (Fig. 7C, D;  
301  $p < 0.05$  for each of these inhibitors) and to TNF- $\alpha$  (Fig. 7E;  $p < 0.01$ ). These findings indicate  
302 that the IL-1 $\beta$  and TNF- $\alpha$ -mediated induction of *MafF* expression in hepatocytes is regulated  
303 by NF- $\kappa$ B signaling. Since we showed that MafF competes with HNF-4 $\alpha$  for its interaction  
304 with HBV core promoter (Fig. 6), we hypothesized that this effect can be enhanced by IL-  
305 1 $\beta$ . We performed a ChIP assay and found that 3 hours after treatment with IL-1 $\beta$ , the  
306 interaction between HNF-4 $\alpha$  and EnhII/Cp $\Delta$ HNF-4 $\alpha$  #2 was significantly reduced. This  
307 effect was partially reversed when *MafF* expression was silenced (Fig. 7F,  $p < 0.01$  for % of  
308 input and fold enrichment). These data mechanistically explain the role of MafF on the  
309 suppression of HBV core promoter activity by the inflammatory cytokine IL-1 $\beta$ .

310

### 311 **8. MafF targets HBV infection in human primary hepatocytes**

312 Loss-of-function experiment in the primary hepatocytes is the ideal experimental platform to  
313 analyze the physiological significance of endogenous MafF on the HBV life cycle. We  
314 silenced *MafF* expression in human primary hepatocytes (PXB cells) using two independent  
315 siRNAs, including si-3, which efficiently targets the *MafF* transcript, and si-2, which was  
316 associated with a negligible silencing efficiency (Fig. 1C and Fig. 8A, upper panels) followed  
317 by infection with HBV (genotype D). *MafF* silencing in response to si-3 resulted in  
318 significant induction of HBV-pgRNA, while administration of si-2 did not yield a similar  
319 effect (Fig. 8A, lower panels;  $p < 0.05$ ). In all experiments, transcription of pgRNA was

320 inversely associated with expression of *MafF* (Fig. 8B,  $p=0.008$ ); these findings confirmed  
321 the role of endogenous MafF with respect to the regulation of HBV-pgRNA transcription.  
322 To confirm our earlier findings documenting induction of *MafF* by IL-1 $\beta$  and TNF- $\alpha$ , we  
323 treated PXB cells with both cytokines and observed a significant increase in *MafF* mRNA  
324 (Fig. 8C,  $p<0.05$  for each cytokine).

325

### 326 **9. *MafF* expression is higher in HBV chronically infected patients with a positive** 327 **correlation to IL-1 $\beta$ and TNF- $\alpha$ expression**

328 To explore a role for MafF in HBV infection in human subjects, we evaluated data from an  
329 open database (71), and found that *MafF* was expressed at significantly higher levels in  
330 patients with chronic HBV compared to healthy individuals (Fig. 9A,  $p<0.0001$ ); this was  
331 notably the case in patients undergoing immune clearance HBV (Fig. 9B,  $p<0.0001$ ). This  
332 result confirmed the induction of *MafF* expression during active inflammation associated  
333 with this infection. This observation was strengthened by the demonstration of positive  
334 correlations between the levels of IL-1 $\beta$  and TNF- $\alpha$  transcripts and those encoding *MafF* in  
335 the immune clearance patient subset (Fig. 9C, D). Interestingly, no correlations were  
336 observed between *MafF* expression and transcripts encoding IFNs (Fig. 9E, F, G, and H).  
337 These data suggest that MafF induction associated with chronic HBV disease was unrelated  
338 to induction of IFN signaling pathways.

339

## 340 **Discussion**

341 The intrinsic or innate immune response is mediated by cellular restriction factors.  
342 Many of these factors are induced by cytokines (29, 56, 58) and serve to suppress different  
343 stages of the viral life cycle, from entry to virion release (5). Several host restriction factors  
344 can suppress transcription from DNA virus promoters (57, 67). In this work, we identified  
345 MafF as a new host restriction factor that can inhibit both HBV via transcriptional  
346 suppression at targeted viral promoter. MafF significantly suppressed HBV core promoter  
347 transcription and consequently HBV-pgRNA, core protein and HBV-DNA levels. MafF-KO  
348 cells showed a significant increase of HBV core protein with no effect on HBs levels. This

349 can be explained by the major suppressive effect exhibited by MafF on HBV-core promoter  
350 in comparison to minimal/no effect of HBV-PreS1, and PreS2 promoters respectively (Fig.  
351 2C.)

352 MafF is a member of the small Maf (sMaf) family of transcription factors, a group  
353 that includes MafG (20), MafK, and MafF (9). The sMafs are bZIP-type transcription factors  
354 that bind to DNA at Maf recognition elements (MAREs). MAREs were initially defined as a  
355 13-bp (TGCTGA(G/C)TCAGCA) or 14-bp (TGCTGA(GC/CG)TCAGCA) elements (22,  
356 25). However, multiple studies (26, 44, 53) have presented findings suggesting heterogeneity  
357 within MARE sequences especially when sMafs heterodimerize with other bZIP-type  
358 transcription factors. Using the JASPAR database for transcription factor binding sites, we  
359 identified a sequence extending from nt 1667 to 1679 (TGGACTCTCAGCG) in the EnhII  
360 region of HBV as a potential MafF/bZIP binding region. Although we did not identify the  
361 dimerization partner of MafF in this study, we hypothesize that MafF binds to this region as  
362 a heterodimer with another bZIP transcription factor based on the weak alignment at the 5'  
363 region of the identified MafF/bZIP binding site when compared to the palindromic MARE  
364 consensus sequence. In fact, sMafs/Bach1 dimers were previously reported to act as  
365 transcriptional repressors (60), also Bach1 binding site showed a close similarity to the  
366 identified MafF/bZIP binding sequence identified in this study (Fig. 5) highlighting the  
367 possibility that heterodimers between Bach1/MafF may be behind the MafF-mediated  
368 suppression of transcription from HBV core promoter reported in this study. Further studies  
369 need to be done to confirm this hypothesis and to identify the dimerization partner of MafF.

370 Both ChIP and functional analysis confirmed the importance of the interaction  
371 between MafF and this specific sequence in HBV core promoter; MafF binding at this core-  
372 promoter region results in suppression of the transcriptional activity from HBV core  
373 promoter and inhibition of the HBV life cycle. Interestingly, the putative MafF/bZIP binding  
374 region in the HBV core promoter showed considerable similarity among several HBV  
375 genotypes, especially genotypes A, B, and C and ancient HBVs. Although the origin of the  
376 HBV infection in humans is still controversial; Paraskevis et al. reported that genotype C is  
377 the oldest of human HBVs (47). Indeed, by analyzing ancient HBVs derived from human

378 skeletons or mummies of the Bronze age to the early modern age (appx. 4,500 - 250 years  
379 ago), we observed a considerable sequence similarity between the putative MafF/bZIP  
380 binding region in these old sequences and that of genotype C (47). These data suggest that  
381 MafF has continuously targeted HBV infection since the HBV infected humans (~ 7,000  
382 years ago). On the other hand, mutations at the 3' region of the putative MafF/bZIP binding  
383 site are more frequent in new world HBV genotypes E, F, and G, suggesting that some HBV  
384 genotypes may acquire mutations to overcome MafF-mediated host restriction; however,  
385 whether these mutations help in evading the suppressive function of MafF and its impact on  
386 HBV life cycle still needs to be addressed.

387         Transcription driven from HBV core promoter is controlled by two enhancers,  
388 enhancer I (EnhI) and EnhII, the latter overlapping with the core promoter (EnhII/Cp);  
389 transcription is also modulated by a negative regulatory element (NRE) (48). Liver-enriched  
390 transcription factors, including C/EBP $\alpha$ , HNF-4 $\alpha$ , HNF3, FTF/LRH-1, and HLF4, can  
391 interact with the EnhII/Cp region and thereby enhance the core promoter activity (15, 51).  
392 Negative regulation of HBV core promoter mainly takes place at the NRE, which is located  
393 immediately upstream of EnhII (38). Our analysis of the EnhII segment revealed an overlap  
394 between MafF and one of the HNF-4 $\alpha$  binding sites located between nt 1662 to nt 1674. We  
395 identified MafF as a novel negative regulator of EnhII activity that acts via competitive  
396 inhibition of HNF-4 $\alpha$  binding to the HBV core promoter at this site; we present this  
397 mechanism as a plausible explanation for MafF-mediated suppression of HBV infection.

398         The expression levels of sMafs serve as strong determinants of their overall function. An  
399 excess of sMafs may increase shift the balance toward transcriptional repression (40). As  
400 discussed previously, sMafs dimerize with CNC family proteins Nrf1, Nrf2, Nrf3, Bach1,  
401 and Bach2 (39). Furthermore, MARE consensus sites include an embedded canonical AP1  
402 motif; as such, some Jun and Fos family factors can also heterodimerize with Maf/CNC  
403 proteins. Finally, large Maf proteins are also capable of binding at MARE elements (21, 41).  
404 Given the large number of possible homo- and heterodimeric combinations of proteins  
405 capable of binding to MAREs, transcriptional responses ranging from subtle to robust can be  
406 elicited at a single MARE site (41). Our findings revealed that MafF expression is induced

407 by IL-1 $\beta$  and TNF- $\alpha$  in primary hepatocytes (PXBs) and that this induction was mediated by  
408 NF- $\kappa$ B, an inducible transcription factor that is a central regulator of immune and  
409 inflammatory responses (30). Both IL-1 $\beta$  and TNF- $\alpha$  have been associated with protection  
410 against HBV. For example, a polymorphism in the IL-1 $\beta$ -gene has been linked to disease  
411 progression in patients with HBV-related hepatitis (35), while TNF- $\alpha$  expression in  
412 hepatocytes induced by HBV (11) has been shown to decrease the extent of HBV persistence  
413 (68). We detected higher levels of *MafF* expression in patients with chronic HBV, especially  
414 among those in the immune clearance group, compared to healthy individuals. Moreover, we  
415 have also reported that IL-1 $\beta$  treatment significantly suppressed HNF-4 $\alpha$  interaction with  
416 EnhII region of HBV core promoter in response to the induction of MafF expression.  
417 Correlation studies in patients' data alone are not conclusive; however, the combination  
418 between the in vitro suppressive function of MafF and patients data suggests a possibly  
419 important role for MafF with respect to the anti-HBV effects of these cytokines in HBV-  
420 infected patients.

421 HBV core promoter regulates the expression of HBV precore and pgRNA transcripts.  
422 The precore-RNA serves as the template for the translation of HBV precore protein. HBV-  
423 pgRNA is translated into two proteins, HBc (the capsid-forming protein) and pol  
424 (polymerase); the HBV-pgRNA also serves as a template for HBV-DNA reverse  
425 transcription and viral replication (1). MafF inhibits HBV replication via suppressing the  
426 production of HBV-pgRNA, thereby limiting the production of the corresponding  
427 replication-associated protein (core; Fig. 3). We showed here that HBV-pgRNA titers in  
428 HBV-infected PXB were higher in cells subjected to MafF silencing; levels of HBV-pgRNA  
429 were inversely correlated with MafF mRNA levels (Fig. 7A and B). These data confirmed  
430 the importance of endogenous MafF with respect to the regulation of HBV-pgRNA  
431 transcription and viral replication. The HBV precore protein is a well-known suppressor of  
432 the anti-HBV immune response (36, 64, 70). As such, suppression of HBV precore protein  
433 expression may promote a MafF-mediated recovery of the anti-HBV immune response and  
434 enhanced viral clearance.

435 To summarize, the results of this work identified MafF as a novel anti-HBV. *MafF*  
436 expression was induced by both IL-1 $\beta$  and TNF- $\alpha$  in primary hepatocytes and also in patients  
437 with chronic HBV. Furthermore, MafF was shown to play an important role in the  
438 suppression of transcription from the HBV core promoter. Further analysis will be needed in  
439 order to determine whether the antiviral function of MafF is effective against other DNA  
440 viruses as well as its impact on viral evasion mechanisms.

441

## 442 **Materials and Methods**

### 443 **Cell culture, reagents and establishment of MafF-KO cells**

444 All the cells used in this study were maintained in culture at 37°C and 5% CO<sub>2</sub>. HepG2,  
445 HepG2-hNTCP-C4, MafF-KO HepG2-hNTCP-C4, and HepAD38.7-Tet cell lines were  
446 cultured in Dulbecco's modified Eagle's medium/F-12 (DMEM/F-12) GlutaMAX media  
447 (Gibco) as previously described (17). Primary human hepatocytes (Phoenixbio; PXB cells)  
448 were cultured as previously described (16). HEK 293FT cells were cultured in DMEM  
449 (Sigma) as previously described (2). For the establishment of puromycin resistant-MafF-KO  
450 cells, HepG2-hNTCP-C4 cells were co-transfected with MafF CRISPR/Cas9 KO Plasmid  
451 (h), sc-411785, and MafF HDR Plasmid (h), sc-411785-HDR, according to manufacturer  
452 instruction. Puromycin selection was conducted at 3  $\mu$ g/mL. Loss of MafF expression was  
453 confirmed by immunoblotting. Myrcludex-B was kindly provided by Dr. Stephan Urban at  
454 University Hospital Heidelberg and was synthesized by CS Bio (Shanghai, China).

### 455 **Plasmid Vectors and Construction**

456 An HBV genotype D subtype ayw replicon (62) was obtained from Addgene. HBV Ae  
457 (genotype A), HBV D\_IND60, and HBV C\_JPNAT are 1.24 HBV replicons, which were  
458 described previously (59). A MafF expression plasmid (pFN21AB8874) was purchased from  
459 Promega. To add a C-terminal HaloTag, the MafF-encoding sequence was subcloned into  
460 the PC14K HaloTag vector using the Carboxy Flexi system (Promega). The reporter plasmid  
461 for the HBV core promoter mutant was generated by introducing two point mutations  
462 (A1676C and C1678A) at the putative MafF binding region (Fig. 4A). Briefly, several rounds  
463 of PCR amplification were performed using pGL4.10\_Ce\_xmut as the template; the resulting



464 products were digested with *HindIII* and *EcoRI* and subcloned into restriction-digested  
465 pGL4.10 (Promega). The set of primers used in the construction of the mutated core promoter  
466 include forward primers 5'-TCGAGGAATTCGGGTACTTTACCACAGGAAC-3' and 5'-  
467 CTTGGACTCTCCGAAATGTCAACG-3' and reverse primers 5'-  
468 TTGCCAAGCTTGAACATGAGATGATTAGGC-3' and  
469 5'-CGTTGACATTTTCGGAGAGTCCAAG-3'. The sequence encoding HNF-4 $\alpha$  was  
470 amplified from FR\_HNF4A2 (Addgene; (61)) by PCR using primers including forward  
471 primer, 5'-AGCTAGGATCCACCATGCGACTCTCCAAAACC-3' and reverse primer 5'-  
472 GAGTCGAATTCTTACTTGTTCGTCATCGTCTTTGTAGTCAGCAACTTGCCCCAAAG  
473 CG-3'. The resulting amplification product was cloned into pCDNA3.1 (Invitrogen) to yield  
474 pCDNA3.1-HNF4A-FLAG. The reporter deletion mutant EnhII/CP $\Delta$ HNF-4 $\alpha$  #2 (Fig. 5A)  
475 was constructed using pGL4.10\_Ce\_xmut as the template and a primer set, including forward  
476 primer 5'- TCGAGGGTACCGCCTGTAAATAGACCTATTG-3' and reverse primer 5'-  
477 CTAACAAGCTTTCCTCCCCCAACTCCTCCC-3'; the amplification product was  
478 subcloned into pGL4.10 using *HindIII* and *KpnI* restriction enzymes. All constructs were  
479 validated by DNA sequencing. Plasmid DNAs used in transfection experiments were purified  
480 using the Purelink Plasmid Midi Kit (Invitrogen).

#### 481 **siRNA library**

482 A Silencer Select™ Human Druggable Genome siRNA Library V4 (4397922, Thermo), was  
483 used for screening of HepG2-hNTCP-C4 cells infected with the HBV/NL reporter virus. The  
484 siRNAs were arrayed in a 96-well format; siRNAs targeting the same genes with different  
485 target sequences were distributed across three plates (A, B, and C). The following plates from  
486 this siRNA library (2200 human genes) were screened: 1-1, 1-2, 1-3, 1-4, 2-1, 2-2, 2-3, 2-4,  
487 3-1, 5-4, 6-2, 6-3, 9-2, 11-3, 11-4, 13-3, 15-1, 15-4, 19-1, 22-2, 25-3, 25-4, 26-1, 26-2, and  
488 26-3. Cellular viability was determined using the XTT assay (Roche) according to the  
489 manufacturer's instructions. Wells with  $\geq 20\%$  loss of cell viability were excluded from  
490 further evaluation. Protocols for the preparation of HBV/NL and screening were as described  
491 previously (45).

#### 492 **DNA and RNA transfection**

493 Plasmid DNA transfection was performed according to the manufacturer's guidelines, using  
494 Lipofectamine 3000 (Invitrogen) for HepG2 cells and Lipofectamine 2000 (Invitrogen) for  
495 HEK 293FT cells. Reverse siRNA transfection into HepG2-hNTCP-C4 or HepG2 was  
496 performed using Lipofectamine RNAiMAX (Thermo Fisher Scientific); forward siRNA  
497 transfection was performed in PXB cells only using Lipofectamine RNAiMAX according to  
498 the respective manufacturer's guidelines. Silencer Select™ si-*MafF* (si-1, s24372; si-2,  
499 s24371; and si-3, s24370), si-*MafK* (s194858), si-*MafG* (s8419), and the negative control  
500 siRNA (#2) were purchased from Thermo Fisher Scientific.

#### 501 **Western blot analysis**

502 Cells were lysed with PRO-PREP protein extraction solution (Intron Biotechnology). Protein  
503 samples were separated on a 12% gel via SDS-PAGE. Immunoblotting and protein detection  
504 were performed as previously reported (2). Primary antibodies included mouse monoclonal  
505 anti-HBc (provided by Dr. Akihito Ryo, Yokohama City University), anti-Halo-tag  
506 (Promega), anti-FLAG (M2, Sigma), and anti-actin (Sigma), rabbit polyclonal anti-MafF  
507 (Protein Tech), and rabbit monoclonal anti-HNF-4 $\alpha$  (Abcam). The band intensities were  
508 quantified by ImageJ software (NIH).

#### 509 **HBV and HBV/NL preparation and infection**

510 HBV particles carrying a chimeric HBV virus encoding NanoLuc (NL) were prepared and  
511 used as described previously (45). Briefly, HepG2 cells were transfected with a plasmid  
512 encoding HBV in which the core region was replaced by a gene encoding NL and a helper  
513 plasmid that carried an HBV genome that was defective in packaging. The resulting HBV/NL  
514 particles produced NL upon infection. HBV and HBV/NL stocks used in this study were  
515 prepared as described previously (17, 45) For infection of HepG2-hNTCP-C4 cells, the cells  
516 first were reverse-transfected with *MafF* or negative control siRNAs two days prior to the  
517 HBV infection and then infected 2 days later with inoculation of HBV or HBV/NL as  
518 described previously (17, 45); the experiment was terminated at 8 days post-infection. For  
519 PXB cells, the cells were first infected with HBV; at 3 days post-infection, the cells were  
520 transfected with the siRNAs, and the experiment was terminated at 7 days post-infection.

#### 521 **RNA extraction and quantitative real-time PCR**

522 Isolation of total cellular RNA was performed with a RNeasy Mini kit (Qiagen) according to  
523 the manufacturer's guidelines and cDNA synthesis was performed using a Superscript VILO  
524 cDNA Synthesis Kit (Thermo Fisher Scientific). The relative levels of the *MafF* mRNA was  
525 determined using TaqMan 746 Gene Expression Assay primer-probe sets (Applied  
526 Biosystems) Hs05026540\_g1, expression of *ACTB* (primer-probe set 748 Hs99999903\_m1)  
527 was used as an internal control for normalization. The quantification of pgRNA, *NTCP*,  
528 *HNF-4 $\alpha$* , *APOA1*, and *HNF1A* was performed using Power SYBR Green PCR Master Mix  
529 (Applied Biosystems); for these transcripts, expression of *GAPDH* was used as an internal  
530 control for normalization. Data were expressed as fold change relative to the mean of the  
531 control group. The set of primers used in these assays included the Precore forward primer  
532 5'-ACTGTTCAAGCCTCCAAGCTGT-3' and reverse primer 5'-  
533 GAAGGCAAAAACGAGAGTAACTCCAC-3', *NTCP* forward primer 5'-  
534 AGGGAGGAGGTGGCAATCAAGAGTGG-3' and reverse primer 5'-  
535 CCGGCTGAAGAACATTGAGGCACTGG-3', *HNF-4 $\alpha$*  forward primer 5'-  
536 ACTACGGTGCCTCGAGCTGT-3' and reverse primer 5'-  
537 GGCCTGGTTCCTCTTGTCT-3'; *APOA1* forward primer 5'-  
538 CCTGGGAAAACAGCTAAACC-3', *APOA1* reverse primer 5'-  
539 CCAGAACTCCTGGGTCACA-3', *HNF1A* forward primer 5'-  
540 CCATCCTCAAAGAGCTGGAG-3', *HNF1A* reverse primer 5'-  
541 TGTTGTGCTGCTGCAGGTA-3', *GAPDH* forward primer 5'-CTTTTGCCTCGCCAG-3'  
542 and reverse primer 5'-TTGATGGCAACAATATCCAC-3'.

### 543 **DNA extraction and cccDNA quantification**

544 For selective extraction of cccDNAs for quantitative PCR, HBV-infected HepG2-hNTCP-  
545 C4 cells were harvested and total DNA was extracted using a Qiagen DNA extraction kit  
546 according to the manufacturer's instructions but without the addition of Proteinase K as  
547 recommended by the concerted harmonization efforts for HBV cccDNA quantification  
548 reported in the 2019 International HBV meeting (28). Levels of cccDNA were measured by  
549 quantitative real-time PCR (qPCR) using the TaqMan Gene Expression Master Mix (Applied  
550 Biosystems), specific primers, and probe as described previously (50). Data were processed

551 as  $2^{(-\Delta\Delta Ct)}$  for quantification of cccDNA using chromosomal *GAPDH* DNA sequence (via  
552 primer-probe set Hs04420697\_g1; Applied Biosystems) as an internal normalization control.

### 553 **Dual luciferase reporter assay**

554 Firefly luciferase reporter plasmids carrying the entire HBV core promoter (nt 900 to 1817),  
555 Enh1/X promoter (nt 950 to 1373), preS1 promoter (nt 2707 to 2847), or preS2/S promoter  
556 (nt 2937 to 3204) were constructed as previously reported (8). HepG2 cells were co-  
557 transfected with the firefly reporter vectors and the *Renilla* luciferase plasmid pRL-TK  
558 (Promega) as an internal control. At 48 h post-transfection, the cells were lysed and luciferase  
559 activities were measured using the Dual-Luciferase Reporter Assay System (Promega). For  
560 experiments involving IL-1 $\beta$ , cells were treated for 3 h with IL-1 $\beta$  (1 ng/ml) at 48 h post-  
561 transfection followed by evaluation of dual luciferase activity.

562

### 563 **Quantification of HBs and HBe antigens**

564 Cell supernatants were harvested and an ELISA was performed as described previously for  
565 HBs (65) whereas for HBe, Enzygnost HBe monoclonal, Siemens was used according to the  
566 manufacturer's instructions.

567

### 568 **Indirect Immunofluorescence Analysis**

569 Indirect immunofluorescence analysis was performed essentially as described previously  
570 (65). After fixation with 4% paraformaldehyde and permeabilization with 0.3% Triton X-  
571 100, an anti-HBc antibody (HBP-023-9, Austral Biologicals) was used as the primary  
572 antibody.

### 573 **Southern blotting assay**

574 HepG2 cells were co-transfected with MafF-encoding or control vectors together with the  
575 HBV ayw plasmid both with or without 5  $\mu$ M entecavir (Sigma) as a control. At 3 days post-  
576 transfection, core-associated DNA was isolated from intracellular viral capsids as described  
577 previously (54). Southern blot analysis to detect HBV-DNAs was performed also as  
578 described previously (2) For the detection of HBV cccDNA by southern blotting, the HBV

579 cccDNA was extracted through protein free Hirt DNA extraction. Hirt DNA was heated at  
580 95°C for 10 minutes to allow the denaturation of DP-rcDNA and dsDNA into single stranded  
581 DNA. The heat-treated samples were then digested with EcoRI to linearize the cccDNA. The  
582 Hirt DNA samples were then separated by agarose gel at 25 volts for 12 hours. After southern  
583 blot transfer, the DNA was hybridized with DIG Easy Hyb (Roche-11603558001) and  
584 detected with DIG wash and block buffer set (Roche-11585762001).

### 585 **Chromatin Immunoprecipitation (ChIP) assay**

586 293FT cells were co-transfected with a MafF expression plasmid together a reporter plasmid  
587 harboring either the WT or mutated core promoter (substitution mutations in MARE) at a 4:1  
588 ratio for assessment of the interactions between MafF and HBV core promoter. In other  
589 experiments, 293FT cells were co-transfected with plasmids encoding FLAG-tagged  
590 EnhII/CPΔHNF-4α#2, and a MafF expression plasmid (or empty vector) at a 1: 2 ratio for  
591 assessment of competitive binding of MafF and HNF-4α. Rabbit monoclonal anti-HNF-4α  
592 (Abcam, EPR16885) was used for IP. To elucidate the effect of IL-1β on MafF and HNF-4α  
593 competition, HepG2 cells were transfected with anti-MafF si-3 and plasmid encoding  
594 EnhII/CPΔHNF-4α#2. At 48 h post-transfection IL-1β was added to the culture medium  
595 (1ng/mL) for 3 hours. ChIP was carried out using a Magna ChIP G kit (Millipore) according  
596 to the manufacturer's instructions. Anti-HNF-4α Rabbit monoclonal antibody (Abcam) was  
597 used for IP.

598

### 599 **Cytokine treatment and NF-κB inhibitors**

600 Responses to IL-1β and TNF-α (R&D Systems) were evaluated in HepG2 cells (at 1 ng/ml  
601 and 10 ng/ml, respectively) and in PXB cells (both at 10 ng/ml) after 1, 3, and 6 h. For the  
602 experiments involving NF-κB inhibitors, Bay11-7082 and BMS-345541 (both from Tocris)  
603 were added to final concentrations of 10 μM and 5 μM, respectively. HepG2 cells were  
604 pretreated for 1 h with each inhibitor followed by the addition of 1 ng/ml IL-1β (for 1 and 3  
605 h) or 10 ng/ml TNF-α (for 1 h). All experiments included phosphate-buffered saline (PBS)  
606 as a diluent control for the cytokines and dimethyl sulfoxide (DMSO) as the diluent control  
607 for the NF-κB inhibitors.

608

## 609 **Database**

610 Transcriptional profiling of the patients with chronic HBV (CHB) (GSE83148) and of HBV  
611 patients with immune tolerance and those undergoing HBV clearance (GSE65359) were  
612 identified in the Gene Expression Omnibus public database. Expression data for *MafF* and  
613 for genes encoding cytokines *IL-1 $\beta$* , *TNF- $\alpha$* , *IFNA1*, *IFN- $\beta$ 1*, *IFNL1*, and *IFNL2* were  
614 extracted by GEO2R. HBx sequences (n = 10,846) were collected from HBVdb (13) , and 13  
615 ancient HBV sequences were downloaded from the NCBI nucleotide database (18, 42, 49).  
616 For each genotype, nucleotide sequences were aligned by using MAFFT version 7.471 (23).  
617 Multiple sequence alignments of the MARE region were depicted using WebLogo version  
618 2.8 (7). The overall height of the stack indicates the conservation at the site while the relative  
619 frequency of each nucleic acid is shown as the height of the characters within the stack.

## 620 **Statistical analysis**

621 The data were analyzed with algorithms included in Prism (v. 5.01; GraphPad Software, San  
622 Diego, CA). Tests for normal distribution of the data were performed. Two-tailed unpaired t  
623 tests, and Mann-Whitney U tests were used for statistical analysis of parametric and non-  
624 parametric data, respectively. The correlation coefficients were determined by Pearson or  
625 Spearman correlation analysis of parametric and non-parametric data, respectively. Values  
626 of  $p \leq 0.05$  were considered statistically significant.

627

## 628 **Acknowledgments**

629 Ibrahim MK was the recipient of a JSPS postdoctoral fellowship. This study was supported  
630 by a Grant-In-Aid for JSPS Fellows (18F18098), and for Scientific Research (19K07586),  
631 and grants from the Research Program on Hepatitis from the Japan Agency for Medical  
632 Research and Development (AMED; 19fk0310104j0903, 19fk0310103j0303,  
633 19fk0310109h0003, and 19fk0310109j0403). Myrcludex-B, a pre-S1 lipopeptide, was kindly  
634 provided by Dr. Stephan Urban at the University Hospital Heidelberg. We gratefully  
635 acknowledge Dr. Akihide Ryo (Yokohama City University School of Medicine) for the kind  
636 gift of the anti-HBV core antibody, Dr. Takayuki Murata (Fujita Health University), Dr. Iwao

637 Kukimoto, Miss Yingfang Li, Dr. Xin Zheng, and Dr. Haruka Kudo (NIID) for productive  
638 discussion, criticism, and technical support. We are also very grateful to Dr. Haitao Guo  
639 (University of Pittsburgh) for his great support that enabled us to detect HBV-cccDNA by  
640 southern blot assay.

641

## 642 **Figure Legends**

### 643 **Figure 1. MafF suppresses HBV infection**

644 **A.** A schematic diagram showing the experimental approach used to screen the siRNA library.

645 **B.** HepG2-hNTCP-C4 cells were transfected with control, *NTCP*, or *MafF*-targeting siRNAs  
646 (si-1, si-2, and si-3); two days later, transfected cells were infected with the HBV/NL reporter  
647 virus. At day 8 post-infection, luciferase assays were performed, and NanoLuc activity was  
648 measured and plotted. **C.** HepG2 cells were transfected with control or *MafF*-targeting  
649 siRNAs (si-1, si-2, and si-3); total protein was extracted after two days. Expression of MafF  
650 (upper panel) and actin (control; lower panel) was analyzed by immunoblotting with their  
651 respective antibodies. **D.** HepG2 cells were transfected with control or *MafF*-targeting siRNA  
652 (si-3); total protein was extracted after ten days. Expression of MafF (upper panel) and actin  
653 (control; lower panel) was analyzed by immunoblotting with their respective antibodies. All  
654 assays were performed in triplicate and included three independent experiments. Data are  
655 presented as mean±standard deviation (SD); \*\* $p<0.01$ , \*\*\* $p<0.001$ , \*\*\*\* $p<0.0001$ ; NS, not  
656 significant

657

### 658 **Figure 2. MafF suppresses the transcriptional activity of the HBV core promoter.**

659 **A.** HepG2-hNTCP-C4 cells were transfected with control or *MafF*-targeting siRNA (si-3).  
660 Two days after transfection, the transfected cells were infected with HBV at 12,000 genomic  
661 equivalents (GEq) per cell. Eight days later, the cells were harvested, DNA was extracted,  
662 and cccDNA was quantified by real-time PCR. The data were normalized to the levels of  
663 endogenous *GAPDH DNA* and are presented as fold change relative to control siRNA-  
664 transfected cells. **B.** HepG2-hNTCP-C4 cells were transfected with control or *MafF*-targeting  
665 siRNA (si-3). Two days after transfection, the transfected cells were infected with HBV at

666 12,000 GEq per cell. Eight days later, the cells were harvested, HIRT purification of DNA  
667 was performed, and cccDNA was visualized by southern blotting assay. **C.** HepG2 cells (left  
668 panel) were co-transfected with a MafF expression vector or empty vector (control) together  
669 with firefly luciferase reporter plasmids with HBV promoters (core, X, S1, and S2) and the  
670 pRL-TK control plasmid encoding *Renilla* luciferase. Two days after transfection, the cells  
671 were harvested and evaluated by dual luciferase assay. HepG2 cells (right panel) were  
672 transfected with control or *MafF*-targeting siRNA (si-3); 24 hours later, the cells were  
673 transfected with firefly luciferase reporter-HBV core promoter vector and the pRL-TK  
674 plasmid encoding *Renilla* luciferase. Two days later, the cells were lysed and evaluated by  
675 dual luciferase assay. For panel C, firefly luciferase data were normalized to *Renilla*  
676 luciferase levels; relative light units (RLUs) for firefly luciferase were plotted as fold  
677 differences relative to the levels detected in the control groups. All assays were performed in  
678 triplicate and included three independent experiments; data are presented as mean±SD.  
679 \*\*\*\* $p < 0.0001$ ; NS, not significant.

680

681 **Figure 3. MafF suppresses HBV life cycle.**

682 **A.** HepG2 cells were transfected with empty (control) or MafF expression vector together  
683 with expression vectors encoding HBV genotypes A and D. Two days later, the cells were  
684 harvested and the pgRNA expression was quantified by real-time RT-PCR. The data were  
685 normalized to the expression of *GAPDH* and are shown as the fold change relative to control  
686 plasmid-transfected cells. **B–D:** HepG2 cells were transfected with empty (control) or MafF  
687 expression vectors together with an expression plasmid encoding HBV genotype D (**B**) At 2  
688 days post-transfection, HBeAg in the cell culture supernatants were quantified by ELISA.  
689 (**C**) The intracellular levels of HBV core protein (upper left panel) and actin (loading control;  
690 lower left panel) were evaluated by immunoblotting; the intensities of the bands (right panel)  
691 were quantified by ImageJ software. (**D**) At 3 days post-transfection, the levels of  
692 intracellular core-associated DNA were determined by southern analysis; transfected cells  
693 treated with 10  $\mu$ M entecavir were used as controls.



694 Data are presented as fold differences relative to the control plasmid-transfected cells. All  
695 assays were performed in triplicate and include results from three independent experiments;  
696 data are presented as mean±SD; \* $p$ <0.05, \*\*\*\* $p$ <0.0001.

697

698 **Fig. 4. Enhanced expression of HBc in MafF-KO cells.**

699 A. HepG2-hNTCP-C4 cells were co-transfected with MAfF CRISPR/Cas9 KO Plasmid (h),  
700 sc-411785, and MAfF HDR Plasmid (h), sc-411785-HDR. Puromycin selection was  
701 conducted at 3µg/mL for 2 weeks. 11 isolated colonies were picked and scaled up. MafF  
702 expression was detected by immunoblotting, as positive and negative controls, we used WT  
703 (HepG2-hNTCP-C4) cells, and si-3 treated HepG2-hNTCP-C4 cells respectively. B. HepG2-  
704 hNTCP-C4, MafF-KO-8, and MafF-KO-11 cells were infected with HBV/NL reporter virus.  
705 Cells were pretreated with or without 1 µM Myrcludex-B or vehicle (DMSO) for 3 h before  
706 infection. At day 8 post-infection, luciferase assays were performed, and NanoLuc activity  
707 was measured and plotted as fold-difference relative to the mean luciferase levels in HepG2-  
708 hNTCP-C4 cells. C. HepG2-hNTCP-C4, or MafF-KO-11 cells were infected with HBV  
709 (6000 GEq/cell), at 12 days post-infection, HBc in the cells was detected by  
710 immunofluorescent (left panel) and fluorescent intensity was plotted as fold-difference  
711 relative to its mean levels in HBV-infected HepG2-hNTCP-C4 cells. D. HepG2-hNTCP-C4,  
712 or MafF-KO-11 cells were infected with HBV (6000 GEq/cell). Cells were pretreated with  
713 or without 1 µM Myrcludex-B or vehicle (DMSO) for 3 h before infection. After 12 days from  
714 infection, HBsAg in the cell culture supernatants was measured and plotted as fold-difference  
715 relative to the its mean levels in the supernatant of HBV-infected HepG2-hNTCP-C4 cells.  
716 All assays were performed in triplicate and include results from three independent  
717 experiments; data are presented as mean±SD; \*\* $p$ <0.01, \*\*\* $p$ <0.001.

718

719

720 **Figure 5. Physical interaction of MafF with HBV core promoter is required for**  
721 **transcriptional repression.**

722 **A.** A schematic representation of the putative MafF/bZIP binding region within enhancer 2  
723 (EnhII) of the HBV core promoter from HBV genotype C. A mutant construct was prepared  
724 by introducing two point mutations (A1676C and C1678A) into the MARE sequence  
725 identified in the wild-type (WT) core promoter. **B.** HepG2 cells were co-transfected with  
726 mock (left panel) or a MafF expression plasmid (right panel) along with an HBV core  
727 promoter (WT or mutant)-reporter plasmid and pRL-TK encoding *Renilla* luciferase. At two  
728 days post-transfection, a dual luciferase assay was performed; firefly luciferase data were  
729 normalized relative to *Renilla* luciferase levels, and RLU for firefly luciferase are plotted as  
730 fold differences relative to activity in the control group. **C.** 293FT cells were transfected with  
731 either the WT or mutant HBV core promoter-luciferase reporter plasmid together with a  
732 MafF expression plasmid (at a ratio 1:4). At two days post-transfection, cell lysates were  
733 collected; two aliquots (1/10 volume each) were removed from each sample. One aliquot was  
734 used for the detection of MafF protein (Input) and actin (loading control) by immunoblotting  
735 (right upper and middle panels); the second aliquot was used for DNA extraction and  
736 detection of HBV core promoter (Input) by real-time PCR. The remaining cell lysates (each  
737 8/10 of the original volume) were subjected to ChIP assay using either isotype control  
738 antibody (rabbit IgG) or rabbit anti-MafF IgG to detect MafF. Following  
739 immunoprecipitation (IP), 1/10 volume of each IP sample was analyzed by immunoblotting  
740 for MafF (right lower panel); each remaining IP sample was subjected to DNA extraction  
741 and real-time PCR assay in order to detect associated HBV core promoter DNA. The fraction  
742 of core promoter DNA immunoprecipitated compared to the input value was determined by  
743 real-time PCR and was expressed as percent of input (% of input) and as the fold enrichment  
744 over the fraction of *GAPDH* DNA immunoprecipitated. **D.** A schematic representation of the  
745 putative MafF/bZIP binding region within enhancer 2 (EnhII) of the HBV core promoter  
746 from different HBV genotypes. 10,846 HBx sequences were collected from HBVdb, The  
747 multiple sequence alignments of the MARE region were depicted by using WebLogo version  
748 2.8. The overall height of the stack indicates the conservation at the site, while the relative  
749 frequency of each nucleic acid is shown as the height of the characters within the stack. The

750 assays of panel B and C were performed in triplicate and include data from three independent  
751 experiments. Data are presented as mean±SD; \* $p$ <0.05, \*\* $p$ <0.01, \*\*\*\* $p$ <0.0001.

752

753 **Figure 6. MafF competes with HNF-4 $\alpha$  for binding to the HBV core promoter.**

754 **A.** A schematic representation of the enhancer 2 (EnhII) and the basal HBV core promoter  
755 (Cp; nt 1591-1798) featuring the putative MafF binding region (nt 1667–1679) and the two  
756 HNF-4 $\alpha$  binding sites HNF-4 $\alpha$ #1 (nt 1662–1674) and HNF-4 $\alpha$ #2 (nt 1757–1769). A deletion  
757 mutant construct (EnhII/Cp  $\Delta$  HNF-4 $\alpha$ #2, nt 1591–1750) was prepared to eliminate HNF-

758 4 $\alpha$ #2. **B.** 293FT cells were co-transfected with the EnhII/Cp  $\Delta$  HNF-4 $\alpha$ #2-luciferase reporter

759 plasmid, a FLAG-tagged HNF-4 $\alpha$  expression plasmid, and a MafF (or control) expression

760 plasmid at a ratio of 1:1:2. At two days post-transfection, cell lysates were collected and two

761 aliquots (1/10 volume each) were removed from each sample. One aliquot was used for the

762 detection of HNF-4 $\alpha$  protein (Input) and actin (loading control) by immunoblotting (lower

763 panel); the second aliquot was used for DNA extraction and detection of HBV core promoter

764 (Input) by real-time PCR. The remaining cell lysates (each 4/10 of the original volume) were

765 subjected to ChIP assay using isotype control antibody (rabbit IgG) or rabbit anti-HNF-4 $\alpha$

766 IgG to precipitate FLAG-tagged HNF-4 $\alpha$ . Following immunoprecipitation (IP), 1/5 volume

767 of each IP sample was analyzed by immunoblotting to detect HNF-4 $\alpha$  (lower panel) and each

768 remaining IP sample was subjected to DNA extraction and real-time PCR assay for the

769 detection of associated HBV core promoter DNA. The fraction of core promoter DNA

770 immunoprecipitated compared to the input value was determined by real-time PCR and was

771 expressed as percent of input (% of input) (upper left panel) and as the fold enrichment (upper

772 right panel) over the fraction of *GAPDH* DNA immunoprecipitated. **C. Left panel:** HepG2

773 cells were transfected with empty vector (control) or MafF expression vector. After 24 h or

774 48 h, total RNA was extracted and *HNF-4 $\alpha$*  expression was quantified by real-time RT-PCR.

775 The data were normalized to *GAPDH* expression and are presented as fold differences

776 relative to the control cells. **Right panel:** HepG2 cells were transfected with control or *MafF*-

777 targeting siRNA (si-3) and *HNF-4 $\alpha$*  expression was evaluated 48 h later as noted just above.

778 **D.** HepG2 cells were transfected with control or *MafF*-targeting siRNA (si-3), and *HNF1A*  
779 and *ApoA-1* expression was evaluated after 48 h as previously mentioned . All assays were  
780 performed in triplicate and data are presented from three independent experiments. Data are  
781 presented as mean±SD; \* $p$ <0.05, \*\* $p$ <0.01; NS, not significant.

782

783 **Figure 7. IL-1 $\beta$  and TNF- $\alpha$  induce MafF expression via NF- $\kappa$ B-mediated signaling**

784 **A.** HepG2 cells were treated with IL-1 $\beta$  (1 ng/ml), TNF- $\alpha$  (10 ng/ml), or PBS (diluent  
785 control) for the times as indicated (hours). The cells then were lysed, total cellular RNA was  
786 extracted, and *MafF* mRNA was quantified by real-time RT-PCR. The data were normalized  
787 to the expression of *ACTB* and are shown as the fold change relative to the mean of the control  
788 group. **B.** HepG2 cells were treated for 24 h with IL-1 $\beta$ , TNF- $\alpha$ , or PBS control as in A.; the  
789 cells then were harvested and total protein was extracted. Expression of MafF (upper panel)  
790 and actin (the loading control; lower panel) was analyzed by immunoblotting. **C, D, and E.**  
791 HepG2 cells were pretreated with NF- $\kappa$ B inhibitors Bay11-7082, BMS-345541, or DMSO  
792 (diluent control) for 1 h and then treated with 1 ng/ml IL-1 $\beta$  (**C, D**), 10 ng TNF- $\alpha$  (**E**) or PBS  
793 (control) for 1 and 3 h. Expression of MafF was quantified by real-time RT-PCR and were  
794 normalized to the expression of the *ACTB* and shown as the fold change relative to the mean  
795 of the control group. **F.** HepG2 cells were transfected with the anti-MafF si-3 and EnhII/Cp  
796  $\Delta$  HNF-4 $\alpha$ #2-luciferase reporter plasmid. At two days post-transfection, cells were treated  
797 with IL-1 $\beta$  (1 ng/mL) or mock for 3 hours, then cell lysates were collected and two aliquots  
798 (1/10 volume each) were removed from each sample. One aliquot was used for the detection  
799 of HNF-4 $\alpha$  protein (Input) and actin (loading control) by immunoblotting (lower panel); the  
800 second aliquot was used for DNA extraction and detection of HBV core promoter (Input) by  
801 real-time PCR. The remaining cell lysates (each 4/10 of the original volume) were subjected  
802 to ChIP assay using isotype control antibody (rabbit IgG) or rabbit anti-HNF-4 $\alpha$  IgG to  
803 precipitate endogenous HNF-4 $\alpha$ . Following immunoprecipitation (IP), 1/5 volume of each IP  
804 sample was analyzed by immunoblotting to detect HNF-4 $\alpha$  (lower panel) and each remaining  
805 IP sample was subjected to DNA extraction and real-time PCR assay for the detection of

806 associated EnhII/Cp  $\Delta$  HNF-4 $\alpha$ #2 DNA. The fraction of EnhII/Cp  $\Delta$  HNF-4 $\alpha$ #2 DNA  
807 immunoprecipitated compared to the input value was determined by real-time PCR and was  
808 expressed as percent of input (% of input) (upper left panel) and as the fold enrichment (upper  
809 right panel) over the fraction of *GAPDH* DNA immunoprecipitated.  
810 All assays were performed in triplicate and including the results from three (panels A, B, and  
811 C) or two (D, E and F) independent experiments. Data are presented as mean $\pm$ SD; \* $p$ <0.05,  
812 \*\* $p$ <0.01, \*\*\* $p$ <0.001, \*\*\*\* $p$ < 0.0001.

813

814 **Figure 8. MafF suppresses HBV infection in primary human hepatocytes (PXB cells).**

815 **A.** Primary hepatocytes (PXB cells) were infected with HBV virions at 5,000 GEq per cell.  
816 After 3 days, the cells were transfected with control or *MafF*-targeting siRNAs (si-2 and si-  
817 3); at 4 days after transfection, total RNA was extracted. **Upper panel:** *MafF* expression  
818 level was quantified by real-time RT-PCR and normalized to the expression of *ACTB*. **Lower**  
819 **panel:** Levels of pgRNA were quantified by real-time RT-PCR using a standard curve  
820 quantification method. Data are presented as fold differences relative to the control siRNA-  
821 transfected cells. **B.** Correlation between expression of *MafF* mRNA and pgRNA in HBV-  
822 infected and siRNA-transfected PXB cells as described in A. **C.** Primary hepatocytes (PXB)  
823 cells were treated with IL-1 $\beta$  (at 10 ng/ml), TNF- $\alpha$  (at 10 ng/ml), or PBS (diluent control) for  
824 the times indicated (hours). The cells then were lysed, total cellular RNA was extracted, and  
825 *MafF* mRNA was quantified by real-time RT-PCR. The data were normalized to the  
826 expression of *ACTB* and are shown as the fold change relative to the mean of the control  
827 group. **D.** *MafF* mRNA expression detected by RNA sequencing in single primary hepatocyte  
828 (PXB) infected with HBV. All assays were performed in triplicate and include data from two  
829 independent experiments. Data are presented as mean $\pm$ SD; \* $p$ <0.05, \*\* $p$ <0.01; NS, not  
830 significant

831

832 **Figure 9. MafF expression is increased in patients with chronic HBV infections and is**  
833 **positively correlated to expression of IL-1 $\beta$  and TNF- $\alpha$  mRNAs**

834 **A.** *MafF* mRNA levels in the liver tissue of patients with chronic hepatitis B infection (CHB;  
835 n=122) and healthy subjects (n=6, GSE83148). **B.** *MafF* mRNA levels in the liver tissue of  
836 immune-tolerant (n=22) and immune clearance (n=50) HBV-infected patients (GSE65359).  
837 **C.-H.** Correlations between the expression of mRNAs encoding *MafF* and **C.** *IL-1 $\beta$* , **D.** *TNF-*  
838  *$\alpha$* , **E.** *IFN- $\beta$ 1*, **F.** *IFNA1*, **G.** *IFNL1*, and **H.** *IFNL2* in liver tissue of patients undergoing  
839 immune clearance. In panels A and D, data are presented as the mean $\pm$ SD; \*\*\*\**p*<0.0001.

840

841

## 842 References

843

- 844 1. **Abraham, T. M., and D. D. Loeb.** 2007. The topology of hepatitis B virus pregenomic RNA  
845 promotes its replication. *J Virol* **81**:11577-84.
- 846 2. **Aly, H. H., J. Suzuki, K. Watashi, K. Chayama, S. Hoshino, M. Hijikata, T. Kato, and T. Wakita.**  
847 2016. RNA Exosome Complex Regulates Stability of the Hepatitis B Virus X-mRNA Transcript  
848 in a Non-stop-mediated (NSD) RNA Quality Control Mechanism. *J Biol Chem* **291**:15958-74.
- 849 3. **Amini-Bavil-Olyaei, S., Y. J. Choi, J. H. Lee, M. Shi, I. C. Huang, M. Farzan, and J. U. Jung.**  
850 2013. The antiviral effector IFITM3 disrupts intracellular cholesterol homeostasis to block  
851 viral entry. *Cell Host Microbe* **13**:452-64.
- 852 4. **Bartenschlager, R., and H. Schaller.** 1992. Hepadnaviral assembly is initiated by polymerase  
853 binding to the encapsidation signal in the viral RNA genome. *EMBO J* **11**:3413-20.
- 854 5. **Chemudupati, M., A. D. Kenney, S. Bonifati, A. Zani, T. M. McMichael, L. Wu, and J. S.**  
855 **Yount.** 2019. From APOBEC to ZAP: Diverse mechanisms used by cellular restriction factors  
856 to inhibit virus infections. *Biochim Biophys Acta Mol Cell Res* **1866**:382-394.
- 857 6. **Chen, G., C. H. Liu, L. Zhou, and R. M. Krug.** 2014. Cellular DDX21 RNA helicase inhibits  
858 influenza A virus replication but is counteracted by the viral NS1 protein. *Cell Host Microbe*  
859 **15**:484-93.
- 860 7. **Crooks, G. E., G. Hon, J. M. Chandonia, and S. E. Brenner.** 2004. WebLogo: a sequence logo  
861 generator. *Genome Res* **14**:1188-90.
- 862 8. **Deng, L., X. Gan, M. Ito, M. Chen, H. H. Aly, C. Matsui, T. Abe, K. Watashi, T. Wakita, T.**  
863 **Suzuki, T. Okamoto, Y. Matsuura, M. Mizokami, I. Shoji, and H. Hotta.** 2019. Peroxiredoxin  
864 1, a Novel HBx-Interacting Protein, Interacts with Exosome Component 5 and Negatively  
865 Regulates Hepatitis B Virus (HBV) Propagation through Degradation of HBV RNA. *J Virol* **93**.
- 866 9. **Fujiwara, K. T., K. Kataoka, and M. Nishizawa.** 1993. Two new members of the maf  
867 oncogene family, mafK and maff, encode nuclear b-Zip proteins lacking putative trans-  
868 activator domain. *Oncogene* **8**:2371-80.
- 869 10. **Gilbert, S., L. Galarneau, A. Lamontagne, S. Roy, and L. Belanger.** 2000. The hepatitis B virus  
870 core promoter is strongly activated by the liver nuclear receptor fetoprotein transcription  
871 factor or by ectopically expressed steroidogenic factor 1. *J Virol* **74**:5032-9.

- 872 11. **Gonzalez-Amaro, R., C. Garcia-Monzon, L. Garcia-Buey, R. Moreno-Otero, J. L. Alonso, E.**  
873 **Yague, J. P. Pivel, M. Lopez-Cabrera, E. Fernandez-Ruiz, and F. Sanchez-Madrid.** 1994.  
874 Induction of tumor necrosis factor alpha production by human hepatocytes in chronic viral  
875 hepatitis. *J Exp Med* **179**:841-8.
- 876 12. **Gripon, P., I. Cannie, and S. Urban.** 2005. Efficient inhibition of hepatitis B virus infection by  
877 acylated peptides derived from the large viral surface protein. *J Virol* **79**:1613-22.
- 878 13. **Hayer, J., F. Jadeau, G. Deleage, A. Kay, F. Zoulim, and C. Combet.** 2013. HBVdb: a  
879 knowledge database for Hepatitis B Virus. *Nucleic Acids Res* **41**:D566-70.
- 880 14. **Hirsch, R. C., J. E. Lavine, L. J. Chang, H. E. Varmus, and D. Ganem.** 1990. Polymerase gene  
881 products of hepatitis B viruses are required for genomic RNA packaging as well as for reverse  
882 transcription. *Nature* **344**:552-5.
- 883 15. **Ishida, H., K. Ueda, K. Ohkawa, Y. Kanazawa, A. Hosui, F. Nakanishi, E. Mita, A. Kasahara,**  
884 **Y. Sasaki, M. Hori, and N. Hayashi.** 2000. Identification of multiple transcription factors, HLF,  
885 FTF, and E4BP4, controlling hepatitis B virus enhancer II. *J Virol* **74**:1241-51.
- 886 16. **Ishida, Y., C. Yamasaki, A. Yanagi, Y. Yoshizane, K. Fujikawa, K. Watashi, H. Abe, T. Wakita,**  
887 **C. N. Hayes, K. Chayama, and C. Tateno.** 2015. Novel robust in vitro hepatitis B virus  
888 infection model using fresh human hepatocytes isolated from humanized mice. *Am J Pathol*  
889 **185**:1275-85.
- 890 17. **Iwamoto, M., K. Watashi, S. Tsukuda, H. H. Aly, M. Fukasawa, A. Fujimoto, R. Suzuki, H.**  
891 **Aizaki, T. Ito, O. Koiwai, H. Kusuhara, and T. Wakita.** 2014. Evaluation and identification of  
892 hepatitis B virus entry inhibitors using HepG2 cells overexpressing a membrane transporter  
893 NTCP. *Biochem Biophys Res Commun* **443**:808-13.
- 894 18. **Kahila Bar-Gal, G., M. J. Kim, A. Klein, D. H. Shin, C. S. Oh, J. W. Kim, T. H. Kim, S. B. Kim,**  
895 **P. R. Grant, O. Pappo, M. Spigelman, and D. Shouval.** 2012. Tracing hepatitis B virus to the  
896 16th century in a Korean mummy. *Hepatology* **56**:1671-80.
- 897 19. **Kannan, M. B., V. Solovieva, and V. Blank.** 2012. The small MAF transcription factors MAFF,  
898 MAFG and MAFK: current knowledge and perspectives. *Biochim Biophys Acta* **1823**:1841-6.
- 899 20. **Kataoka, K., K. Igarashi, K. Itoh, K. T. Fujiwara, M. Noda, M. Yamamoto, and M. Nishizawa.**  
900 1995. Small Maf proteins heterodimerize with Fos and may act as competitive repressors of  
901 the NF-E2 transcription factor. *Mol Cell Biol* **15**:2180-90.
- 902 21. **Kataoka, K., M. Nishizawa, and S. Kawai.** 1993. Structure-function analysis of the maf  
903 oncogene product, a member of the b-Zip protein family. *Journal of Virology* **67**:2133-2141.
- 904 22. **Kataoka, K., M. Noda, and M. Nishizawa.** 1994. Maf nuclear oncoprotein recognizes  
905 sequences related to an AP-1 site and forms heterodimers with both Fos and Jun. *Mol Cell*  
906 *Biol* **14**:700-12.
- 907 23. **Katoh, K., and D. M. Standley.** 2013. MAFFT multiple sequence alignment software version  
908 7: improvements in performance and usability. *Mol Biol Evol* **30**:772-80.
- 909 24. **Katsuoka, F., and M. Yamamoto.** 2016. Small Maf proteins (MafF, MafG, MafK): History,  
910 structure and function. *Gene* **586**:197-205.
- 911 25. **Kerppola, T. K., and T. Curran.** 1994. A conserved region adjacent to the basic domain is  
912 required for recognition of an extended DNA binding site by Maf/Nrl family proteins.  
913 *Oncogene* **9**:3149-58.
- 914 26. **Kimura, M., T. Yamamoto, J. Zhang, K. Itoh, M. Kyo, T. Kamiya, H. Aburatani, F. Katsuoka,**  
915 **H. Kurokawa, T. Tanaka, H. Motohashi, and M. Yamamoto.** 2007. Molecular basis

- 916 distinguishing the DNA binding profile of Nrf2-Maf heterodimer from that of Maf  
917 homodimer. *J Biol Chem* **282**:33681-90.
- 918 27. **Krause-Kyora, B., J. Susat, F. M. Key, D. Kuhnert, E. Bosse, A. Immel, C. Rinne, S. C. Kornell,**  
919 **D. Yepes, S. Franzenburg, H. O. Heyne, T. Meier, S. Losch, H. Meller, S. Friederich, N.**  
920 **Nicklisch, K. W. Alt, S. Schreiber, A. Tholey, A. Herbig, A. Nebel, and J. Krause.** 2018.  
921 Neolithic and medieval virus genomes reveal complex evolution of hepatitis B. *Elife* **7**.
- 922 28. **Lena Allweiss, M. Y., Barbara Testoni, Julie Lucifora, Chunkyu Ko, Bingqian Qu, Dieter**  
923 **Glebe, Elena S. kim, Mark Lutgehetmann, Stephan Urban, Guofeng Cheng, William**  
924 **Delaney, Massimo Levrero, Ulrike Protzer, Fabien Zoulim, Haitao Guo, Maura Dandri.** 2019.  
925 Final results of the concerted harmonization efforts for HBV cccDNA quantification, 2019  
926 International HBV Meeting, Melbourne, Australia.
- 927 29. **Liang, G., G. Liu, K. Kitamura, Z. Wang, S. Chowdhury, A. M. Monjurul, K. Wakae, M. Koura,**  
928 **M. Shimadu, K. Kinoshita, and M. Muramatsu.** 2015. TGF-beta suppression of HBV RNA  
929 through AID-dependent recruitment of an RNA exosome complex. *PLoS Pathog*  
930 **11**:e1004780.
- 931 30. **Liu, T., L. Zhang, D. Joo, and S. C. Sun.** 2017. NF-kappaB signaling in inflammation. *Signal*  
932 *Transduct Target Ther* **2**.
- 933 31. **Lopez-Cabrera, M., J. Letovsky, K. Q. Hu, and A. Siddiqui.** 1991. Transcriptional factor C/EBP  
934 binds to and transactivates the enhancer element II of the hepatitis B virus. *Virology*  
935 **183**:825-9.
- 936 32. **Massrieh, W., A. Derjuga, F. Doualla-Bell, C. Y. Ku, B. M. Sanborn, and V. Blank.** 2006.  
937 Regulation of the MAFF transcription factor by proinflammatory cytokines in myometrial  
938 cells. *Biol Reprod* **74**:699-705.
- 939 33. **Meurs, E. F., Y. Watanabe, S. Kadereit, G. N. Barber, M. G. Katze, K. Chong, B. R. Williams,**  
940 **and A. G. Hovanessian.** 1992. Constitutive expression of human double-stranded RNA-  
941 activated p68 kinase in murine cells mediates phosphorylation of eukaryotic initiation factor  
942 2 and partial resistance to encephalomyocarditis virus growth. *J Virol* **66**:5805-14.
- 943 34. **Meyerson, N. R., L. Zhou, Y. R. Guo, C. Zhao, Y. J. Tao, R. M. Krug, and S. L. Sawyer.** 2017.  
944 Nuclear TRIM25 Specifically Targets Influenza Virus Ribonucleoproteins to Block the Onset  
945 of RNA Chain Elongation. *Cell Host Microbe* **22**:627-638 e7.
- 946 35. **Migita, K., Y. Maeda, S. Abiru, M. Nakamura, A. Komori, S. Miyazoe, K. Nakao, H.**  
947 **Yatsuhashi, K. Eguchi, and H. Ishibashi.** 2007. Polymorphisms of interleukin-1beta in  
948 Japanese patients with hepatitis B virus infection. *J Hepatol* **46**:381-6.
- 949 36. **Mitra, B., J. Wang, E. S. Kim, R. Mao, M. Dong, Y. Liu, J. Zhang, and H. Guo.** 2019. Hepatitis  
950 B Virus Precore Protein p22 Inhibits Alpha Interferon Signaling by Blocking STAT Nuclear  
951 Translocation. *J Virol* **93**.
- 952 37. **Mogilenko, D. A., E. B. Dizhe, V. S. Shavva, I. A. Lapikov, S. V. Orlov, and A. P.**  
953 **Perevozchikov.** 2009. Role of the nuclear receptors HNF4 alpha, PPAR alpha, and LXRs in  
954 the TNF alpha-mediated inhibition of human apolipoprotein A-I gene expression in HepG2  
955 cells. *Biochemistry* **48**:11950-60.
- 956 38. **Moolla, N., M. Kew, and P. Arbuthnot.** 2002. Regulatory elements of hepatitis B virus  
957 transcription. *J Viral Hepat* **9**:323-31.
- 958 39. **Motohashi, H., F. Katsuoka, J. A. Shavit, J. D. Engel, and M. Yamamoto.** 2000. Positive or  
959 negative MARE-dependent transcriptional regulation is determined by the abundance of  
960 small Maf proteins. *Cell* **103**:865-75.



- 961 40. **Motohashi, H., T. O'Connor, F. Katsuoka, J. D. Engel, and M. Yamamoto.** 2002. Integration  
962 and diversity of the regulatory network composed of Maf and CNC families of transcription  
963 factors. *Gene* **294**:1-12.
- 964 41. **Motohashi, H., J. A. Shavit, K. Igarashi, M. Yamamoto, and J. D. Engel.** 1997. The world  
965 according to Maf. *Nucleic Acids Res* **25**:2953-59.
- 966 42. **Muhlemann, B., T. C. Jones, P. B. Damgaard, M. E. Allentoft, I. Shevnina, A. Logvin, E.  
967 Usmanova, I. P. Panyushkina, B. Boldgiv, T. Bazartseren, K. Tashbaeva, V. Merz, N. Lau, V.  
968 Smrcka, D. Voyakin, E. Kitov, A. Epimakhov, D. Pokutta, M. Vicze, T. D. Price, V. Moiseyev,  
969 A. J. Hansen, L. Orlando, S. Rasmussen, M. Sikora, L. Vinner, A. Osterhaus, D. J. Smith, D.  
970 Glebe, R. A. M. Fouchier, C. Drosten, K. G. Sjogren, K. Kristiansen, and E. Willerslev.** 2018.  
971 Ancient hepatitis B viruses from the Bronze Age to the Medieval period. *Nature* **557**:418-  
972 423.
- 973 43. **Nassal, M.** 2015. HBV cccDNA: viral persistence reservoir and key obstacle for a cure of  
974 chronic hepatitis B. *Gut* **64**:1972-84.
- 975 44. **Ney, P. A., B. P. Sorrentino, C. H. Lowrey, and A. W. Nienhuis.** 1990. Inducibility of the HS  
976 II enhancer depends on binding of an erythroid specific nuclear protein. *Nucleic Acids Res*  
977 **18**:6011-7.
- 978 45. **Nishitsuji, H., S. Ujino, Y. Shimizu, K. Harada, J. Zhang, M. Sugiyama, M. Mizokami, and K.  
979 Shimotohno.** 2015. Novel reporter system to monitor early stages of the hepatitis B virus  
980 life cycle. *Cancer Sci* **106**:1616-24.
- 981 46. **Orzalli, M. H., and D. M. Knipe.** 2014. Cellular sensing of viral DNA and viral evasion  
982 mechanisms. *Annu Rev Microbiol* **68**:477-92.
- 983 47. **Paraskevis, D., G. Magiorkinis, E. Magiorkinis, S. Y. Ho, R. Belshaw, J. P. Allain, and A.  
984 Hatzakis.** 2013. Dating the origin and dispersal of hepatitis B virus infection in humans and  
985 primates. *Hepatology* **57**:908-16.
- 986 48. **Park, Y. K., E. S. Park, D. H. Kim, S. H. Ahn, S. H. Park, A. R. Lee, S. Park, H. S. Kang, J. H. Lee,  
987 J. M. Kim, S. K. Lee, K. H. Lim, N. Isorce, S. Tong, F. Zoulim, and K. H. Kim.** 2016. Cleaved c-  
988 FLIP mediates the antiviral effect of TNF-alpha against hepatitis B virus by dysregulating  
989 hepatocyte nuclear factors. *J Hepatol* **64**:268-277.
- 990 49. **Patterson Ross, Z., J. Klunk, G. Fornaciari, V. Giuffra, S. Duchene, A. T. Duggan, D. Poinar,  
991 M. W. Douglas, J. S. Eden, E. C. Holmes, and H. N. Poinar.** 2018. The paradox of HBV  
992 evolution as revealed from a 16th century mummy. *PLoS Pathog* **14**:e1006750.
- 993 50. **Qu, B., Y. Ni, F. A. Lempp, F. W. R. Vondran, and S. Urban.** 2018. T5 Exonuclease Hydrolysis  
994 of Hepatitis B Virus Replicative Intermediates Allows Reliable Quantification and Fast Drug  
995 Efficacy Testing of Covalently Closed Circular DNA by PCR. *J Virol* **92**.
- 996 51. **Quarleri, J.** 2014. Core promoter: a critical region where the hepatitis B virus makes  
997 decisions. *World J Gastroenterol* **20**:425-35.
- 998 52. **Raney, A. K., J. L. Johnson, C. N. Palmer, and A. McLachlan.** 1997. Members of the nuclear  
999 receptor superfamily regulate transcription from the hepatitis B virus nucleocapsid  
1000 promoter. *J Virol* **71**:1058-71.
- 1001 53. **Rushmore, T. H., M. R. Morton, and C. B. Pickett.** 1991. The antioxidant responsive element.  
1002 Activation by oxidative stress and identification of the DNA consensus sequence required  
1003 for functional activity. *J Biol Chem* **266**:11632-9.
- 1004 54. **Sakurai, F., S. Mitani, T. Yamamoto, K. Takayama, M. Tachibana, K. Watashi, T. Wakita, S.  
1005 Iijima, Y. Tanaka, and H. Mizuguchi.** 2017. Human induced-pluripotent stem cell-derived

- 1006 hepatocyte-like cells as an in vitro model of human hepatitis B virus infection. *Sci Rep*  
1007 **7**:45698.
- 1008 55. **Sandelin, A., W. Alkema, P. Engstrom, W. W. Wasserman, and B. Lenhard.** 2004. JASPAR:  
1009 an open-access database for eukaryotic transcription factor binding profiles. *Nucleic Acids*  
1010 *Res* **32**:D91-4.
- 1011 56. **Schoggins, J. W., D. A. MacDuff, N. Imanaka, M. D. Gainey, B. Shrestha, J. L. Eitson, K. B.**  
1012 **Mar, R. B. Richardson, A. V. Ratushny, V. Litvak, R. Dabelic, B. Manicassamy, J. D. Aitchison,**  
1013 **A. Aderem, R. M. Elliott, A. Garcia-Sastre, V. Racaniello, E. J. Snijder, W. M. Yokoyama, M.**  
1014 **S. Diamond, H. W. Virgin, and C. M. Rice.** 2014. Pan-viral specificity of IFN-induced genes  
1015 reveals new roles for cGAS in innate immunity. *Nature* **505**:691-5.
- 1016 57. **Schreiner, S., S. Kinkley, C. Burck, A. Mund, P. Wimmer, T. Schubert, P. Groitl, H. Will, and**  
1017 **T. Dobner.** 2013. SPOC1-mediated antiviral host cell response is antagonized early in human  
1018 adenovirus type 5 infection. *PLoS Pathog* **9**:e1003775.
- 1019 58. **Shiromoto, F., H. H. Aly, H. Kudo, K. Watashi, A. Murayama, N. Watanabe, X. Zheng, T.**  
1020 **Kato, K. Chayama, M. Muramatsu, and T. Wakita.** 2018. IL-1beta/ATF3-mediated induction  
1021 of Ski2 expression enhances hepatitis B virus x mRNA degradation. *Biochem Biophys Res*  
1022 *Commun* **503**:1854-1860.
- 1023 59. **Sugiyama, M., Y. Tanaka, T. Kato, E. Orito, K. Ito, S. K. Acharya, R. G. Gish, A. Kramvis, T.**  
1024 **Shimada, N. Izumi, M. Kaito, Y. Miyakawa, and M. Mizokami.** 2006. Influence of hepatitis  
1025 B virus genotypes on the intra- and extracellular expression of viral DNA and antigens.  
1026 *Hepatology* **44**:915-24.
- 1027 60. **Sun, J., A. Muto, H. Hoshino, A. Kobayashi, S. Nishimura, M. Yamamoto, N. Hayashi, E. Ito,**  
1028 **and K. Igarashi.** 2001. The promoter of mouse transcription repressor bach1 is regulated by  
1029 Sp1 and trans-activated by Bach1. *J Biochem* **130**:385-92.
- 1030 61. **Thomas, H., S. Senkel, S. Erdmann, T. Arndt, G. Turan, L. Klein-Hitpass, and G. U. Ryffel.**  
1031 2004. Pattern of genes influenced by conditional expression of the transcription factors  
1032 HNF6, HNF4alpha and HNF1beta in a pancreatic beta-cell line. *Nucleic Acids Res* **32**:e150.
- 1033 62. **Wang, H., S. Kim, and W. S. Ryu.** 2009. DDX3 DEAD-Box RNA helicase inhibits hepatitis B  
1034 virus reverse transcription by incorporation into nucleocapsids. *J Virol* **83**:5815-24.
- 1035 63. **Wang, H., P. Maechler, P. A. Antinozzi, K. A. Hagenfeldt, and C. B. Wollheim.** 2000.  
1036 Hepatocyte nuclear factor 4alpha regulates the expression of pancreatic beta -cell genes  
1037 implicated in glucose metabolism and nutrient-induced insulin secretion. *J Biol Chem*  
1038 **275**:35953-9.
- 1039 64. **Wang, Y., L. Cui, G. Yang, J. Zhan, L. Guo, Y. Chen, C. Fan, D. Liu, and D. Guo.** 2019. Hepatitis  
1040 B e Antigen Inhibits NF-kappaB Activity by Interrupting K63-Linked Ubiquitination of NEMO.  
1041 *J Virol* **93**.
- 1042 65. **Watashi, K., G. Liang, M. Iwamoto, H. Marusawa, N. Uchida, T. Daito, K. Kitamura, M.**  
1043 **Muramatsu, H. Ohashi, T. Kiyohara, R. Suzuki, J. Li, S. Tong, Y. Tanaka, K. Murata, H. Aizaki,**  
1044 **and T. Wakita.** 2013. Interleukin-1 and tumor necrosis factor-alpha trigger restriction of  
1045 hepatitis B virus infection via a cytidine deaminase activation-induced cytidine deaminase  
1046 (AID). *J Biol Chem* **288**:31715-27.
- 1047 66. **Wieland, S., R. Thimme, R. H. Purcell, and F. V. Chisari.** 2004. Genomic analysis of the host  
1048 response to hepatitis B virus infection. *Proc Natl Acad Sci U S A* **101**:6669-74.

- 1049 67. **Wustenhagen, E., F. Boukhallouk, I. Negwer, K. Rajalingam, F. Stubenrauch, and L. Florin.**  
1050 2018. The Myb-related protein MYPOP is a novel intrinsic host restriction factor of  
1051 oncogenic human papillomaviruses. *Oncogene* **37**:6275-6284.
- 1052 68. **Xia, Y., D. Stadler, J. Lucifora, F. Reisinger, D. Webb, M. Hosel, T. Michler, K. Wisskirchen,**  
1053 **X. Cheng, K. Zhang, W. M. Chou, J. M. Wettengel, A. Malo, F. Bohne, D. Hoffmann, F. Eyer,**  
1054 **R. Thimme, C. S. Falk, W. E. Thasler, M. Heikenwalder, and U. Protzer.** 2016. Interferon-  
1055 gamma and Tumor Necrosis Factor-alpha Produced by T Cells Reduce the HBV Persistence  
1056 Form, cccDNA, Without Cytolysis. *Gastroenterology* **150**:194-205.
- 1057 69. **Yu, X., and J. E. Mertz.** 1997. Differential regulation of the pre-C and pregenomic promoters  
1058 of human hepatitis B virus by members of the nuclear receptor superfamily. *J Virol* **71**:9366-  
1059 74.
- 1060 70. **Yu, Y., P. Wan, Y. Cao, W. Zhang, J. Chen, L. Tan, Y. Wang, Z. Sun, Q. Zhang, Y. Wan, Y. Zhu,**  
1061 **F. Liu, K. Wu, Y. Liu, and J. Wu.** 2017. Hepatitis B Virus e Antigen Activates the Suppressor  
1062 of Cytokine Signaling 2 to Repress Interferon Action. *Sci Rep* **7**:1729.
- 1063 71. **Zhou, W., Y. Ma, J. Zhang, J. Hu, M. Zhang, Y. Wang, Y. Li, L. Wu, Y. Pan, Y. Zhang, X. Zhang,**  
1064 **Z. Zhang, H. Li, L. Lu, L. Jin, J. Wang, Z. Yuan, and J. Liu.** 2017. Predictive model for  
1065 inflammation grades of chronic hepatitis B: Large-scale analysis of clinical parameters and  
1066 gene expressions. *Liver Int* **37**:1632-1641.
- 1067
- 1068

**Fig. 1****A**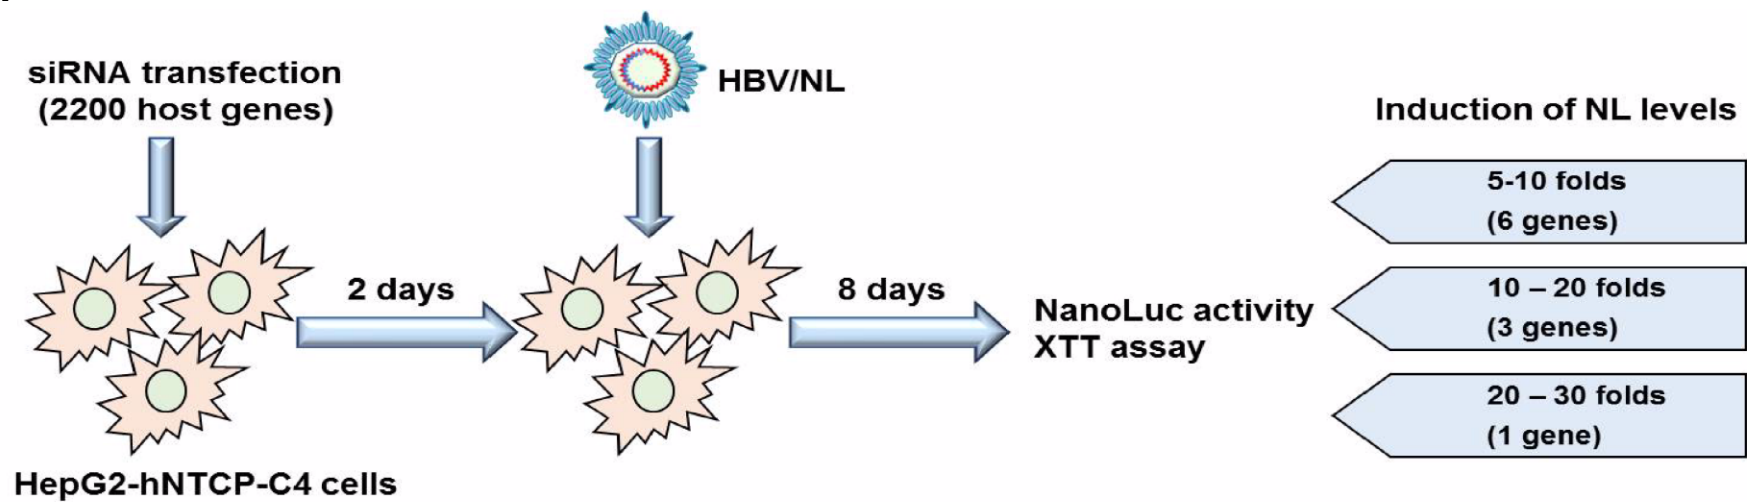**B**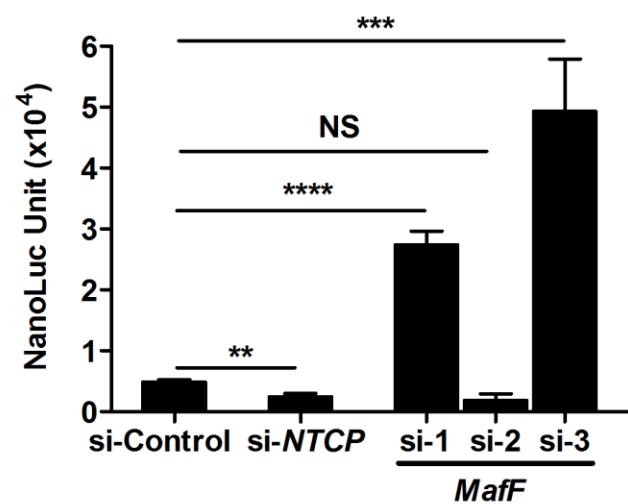**C**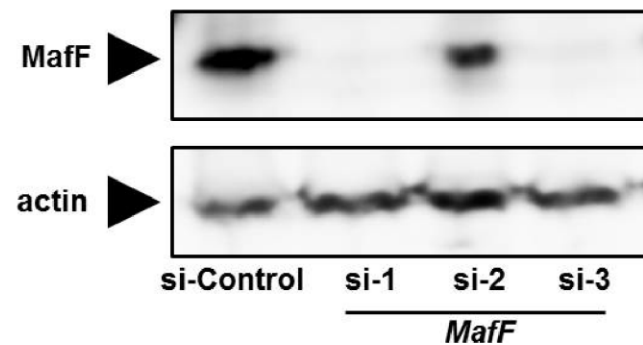**D**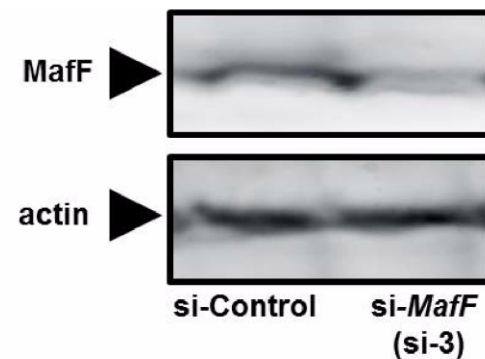

**Fig. 2**

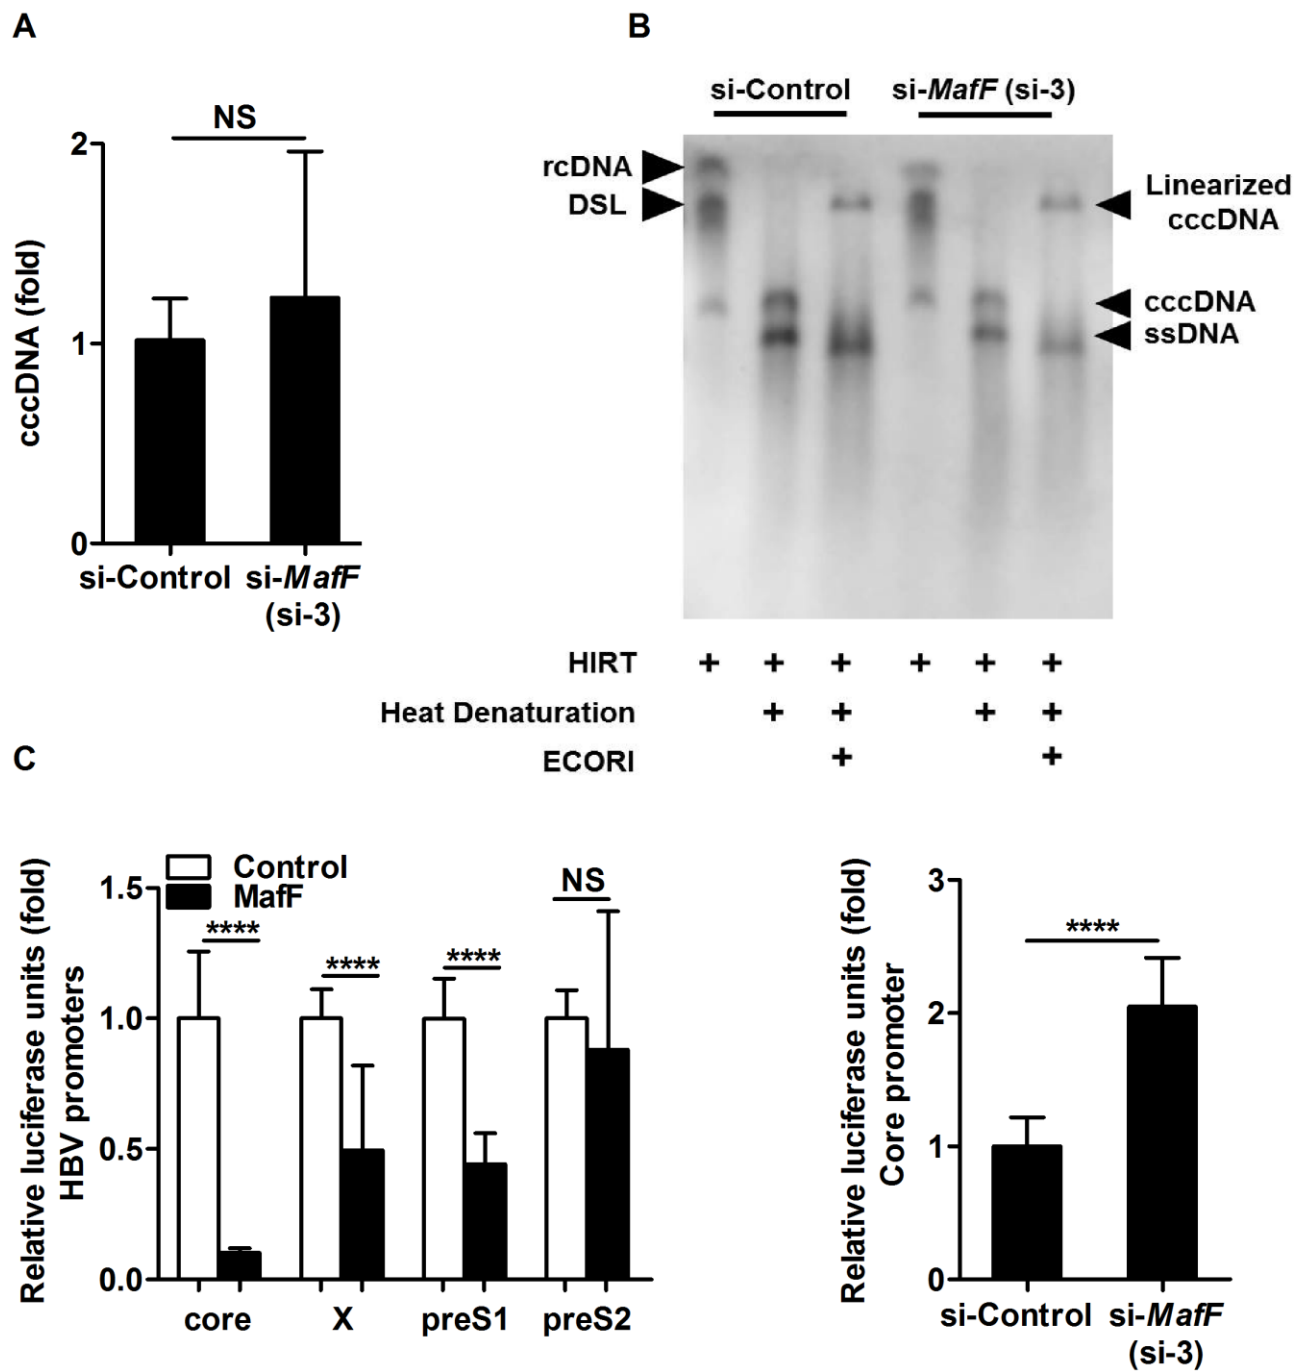

**Fig. 3**

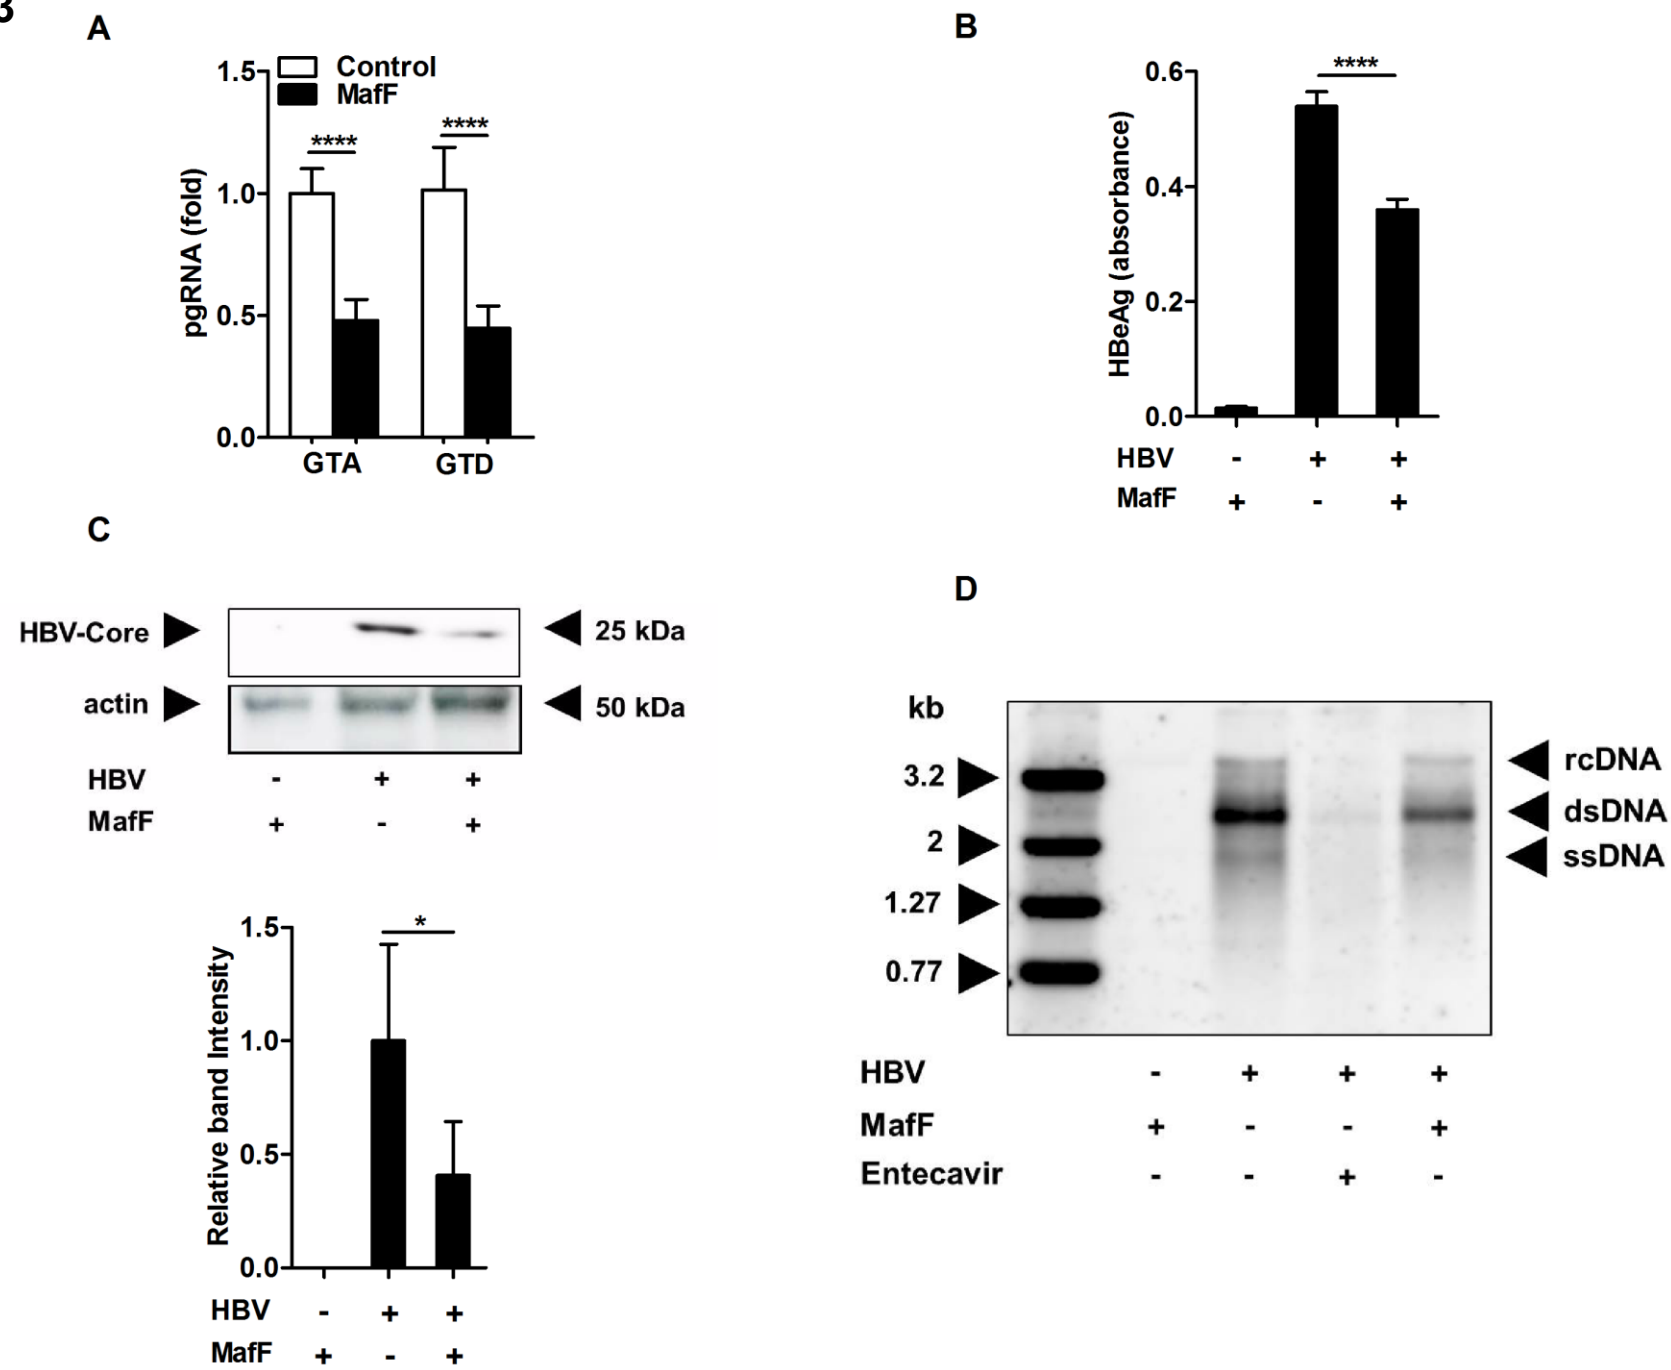

**Fig. 4**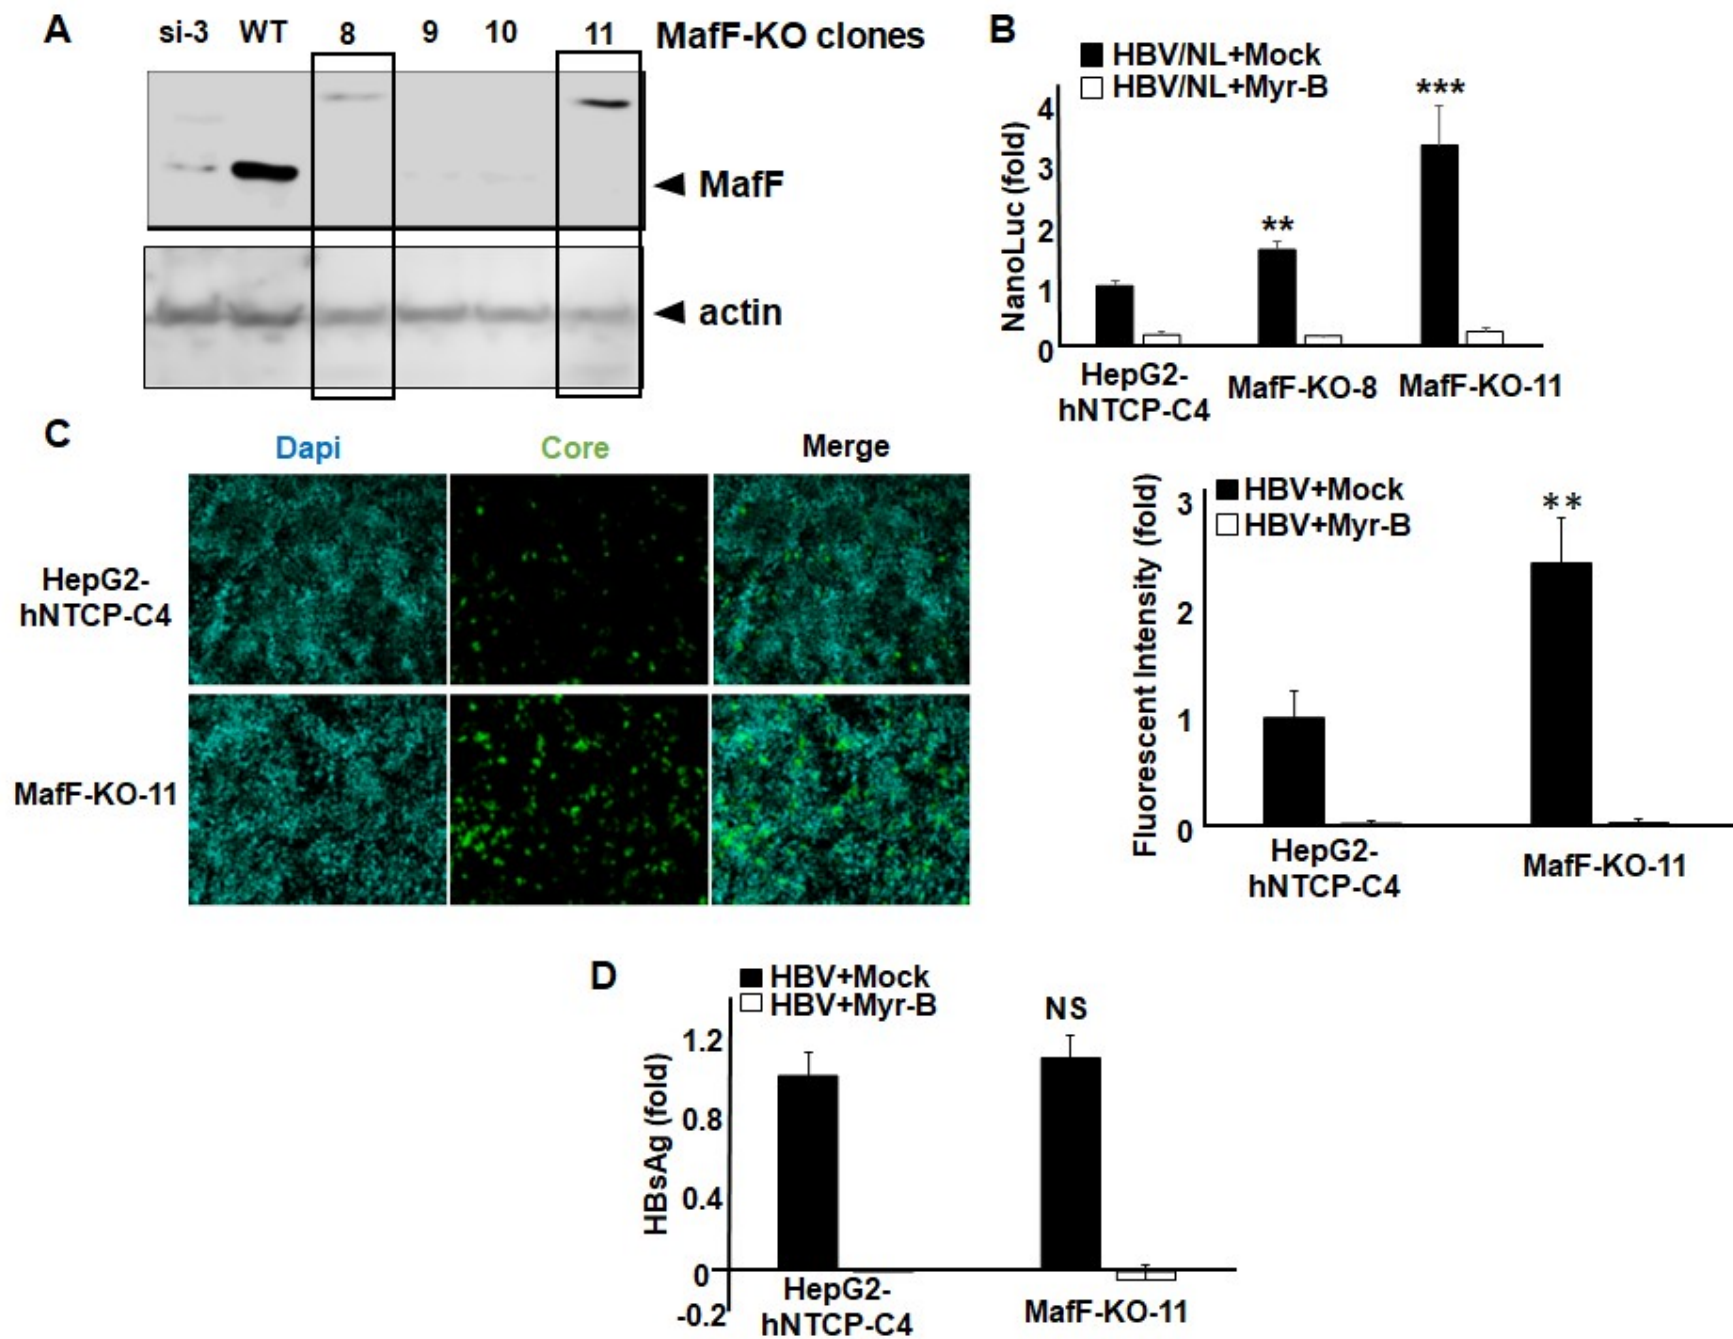

**Fig. 5**

**A**

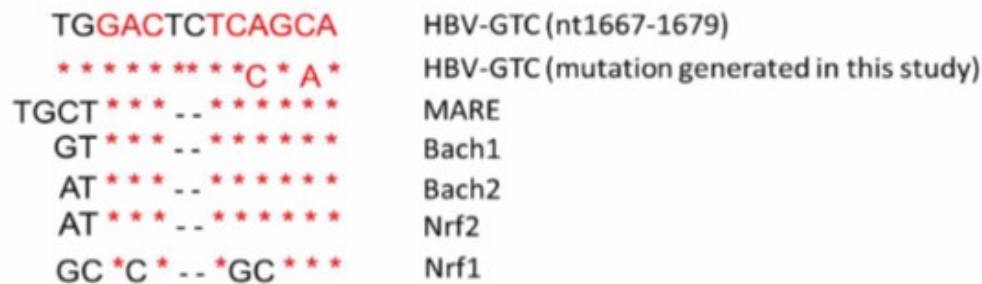

**B**

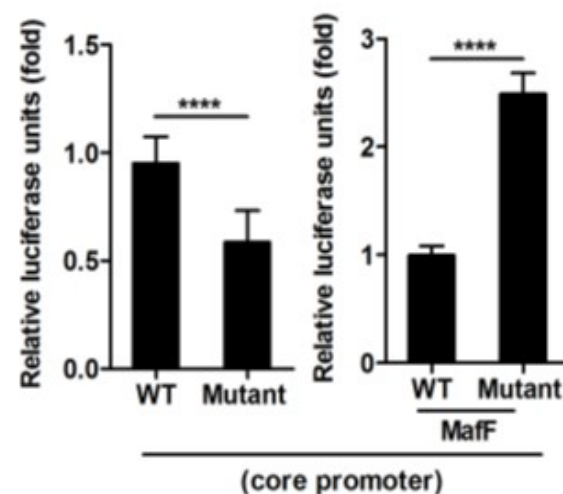

**C**

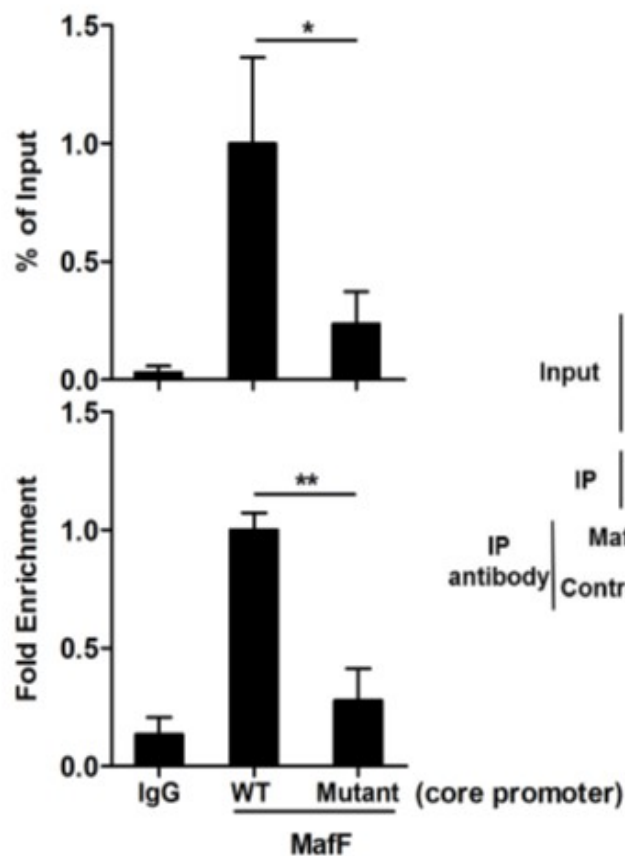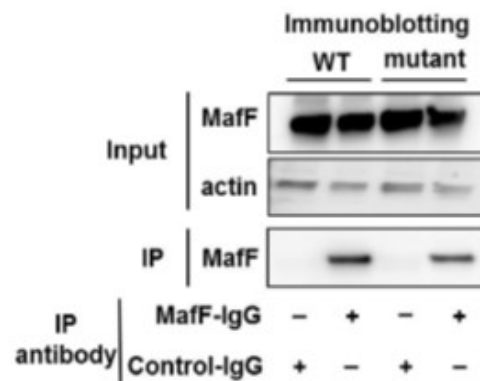

**D**

Seqlogo at MARE region

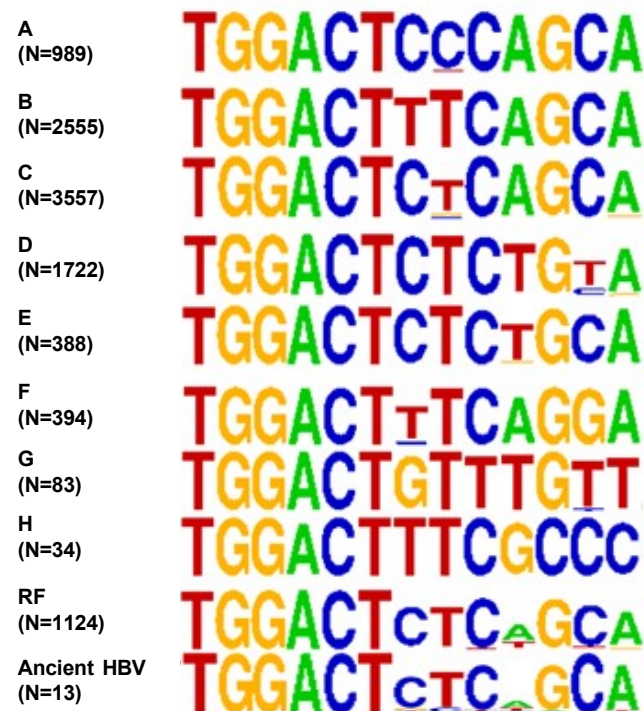



**Fig. 6**

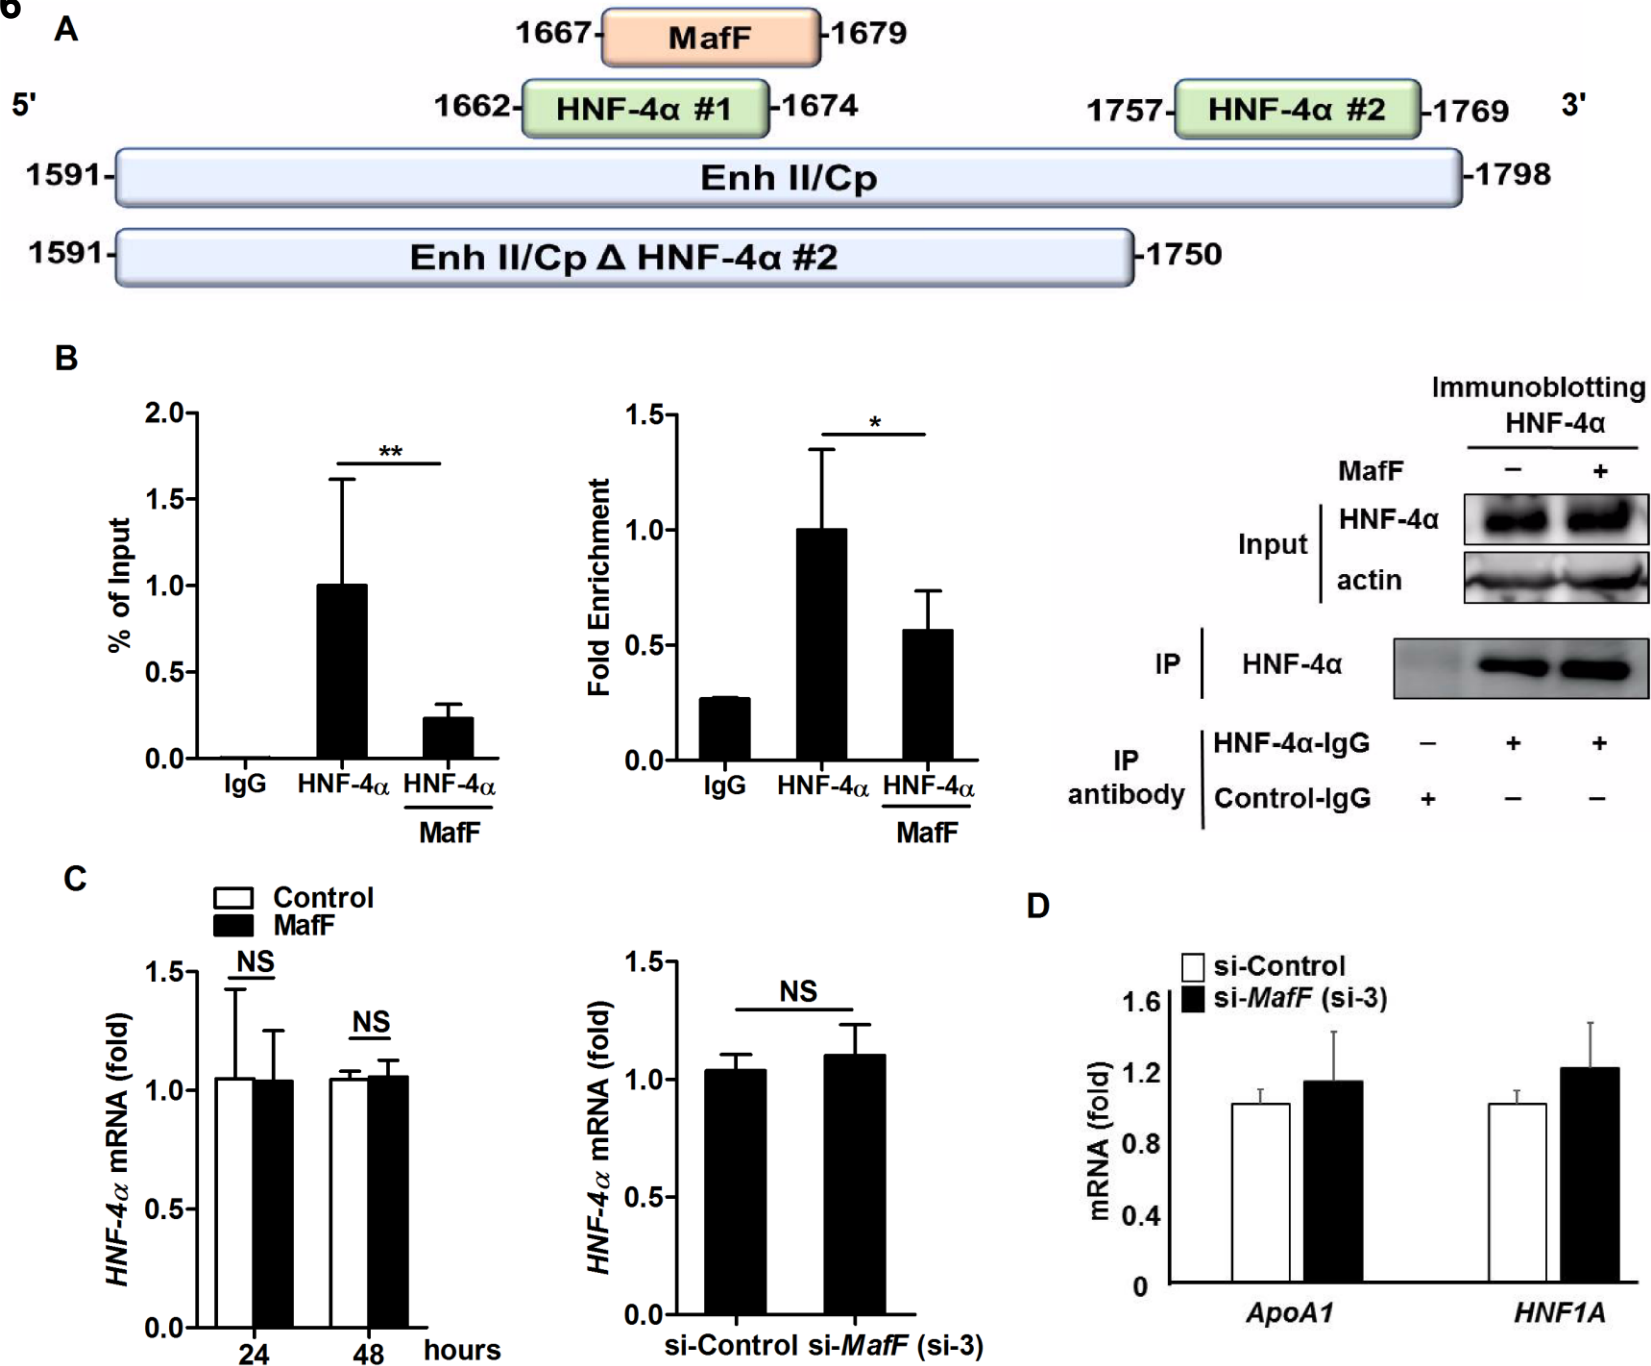

**Fig. 7**

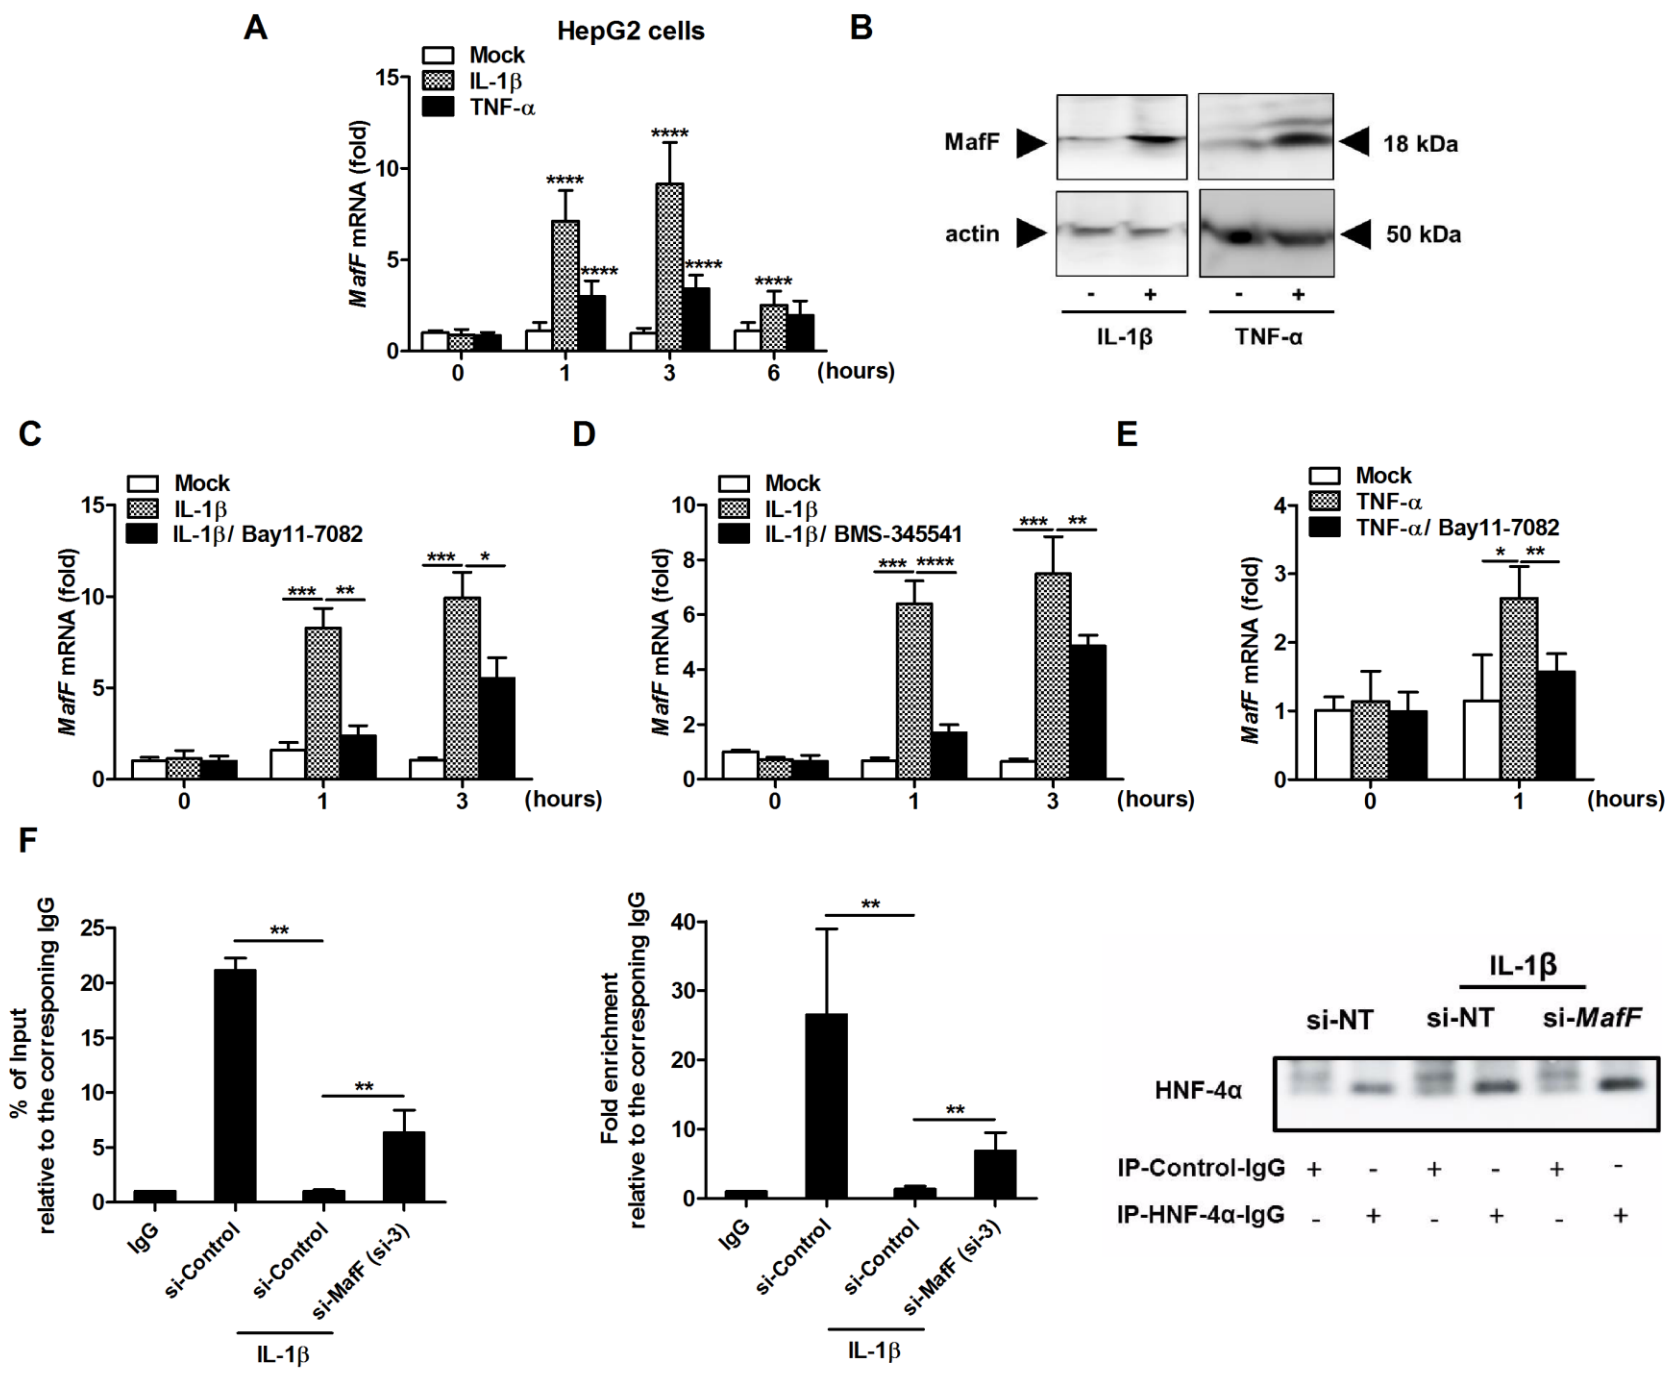

**Fig. 8****A**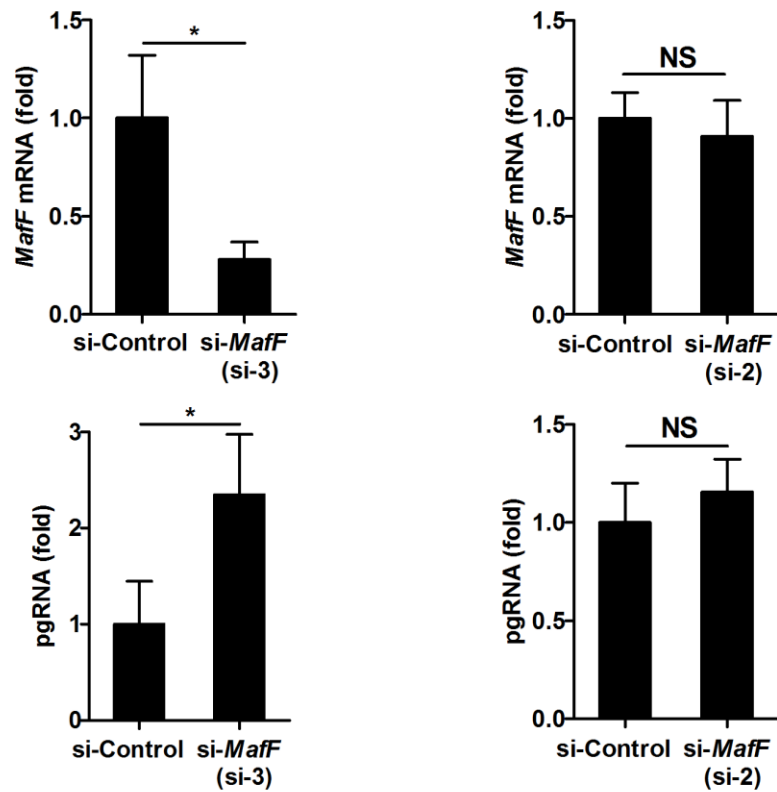**B**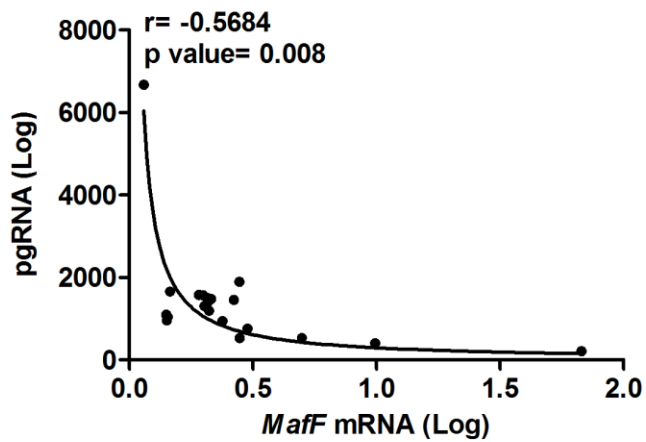**C**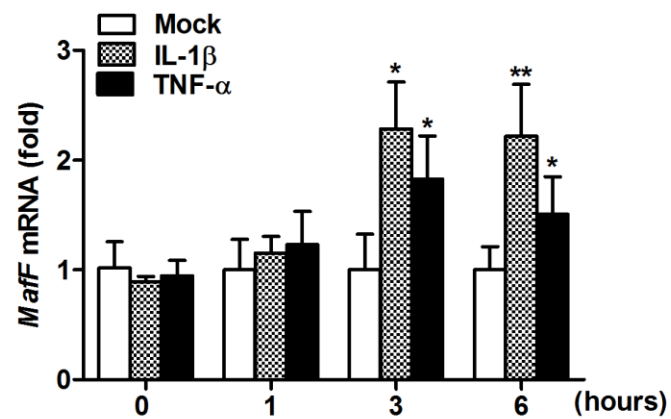

**Fig. 9****A**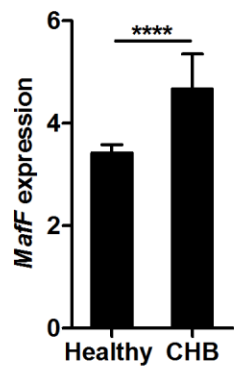**B**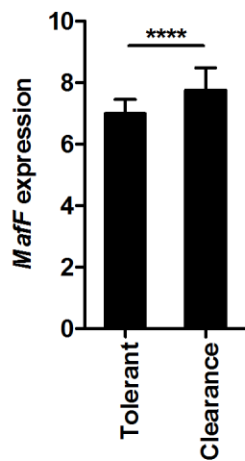**C**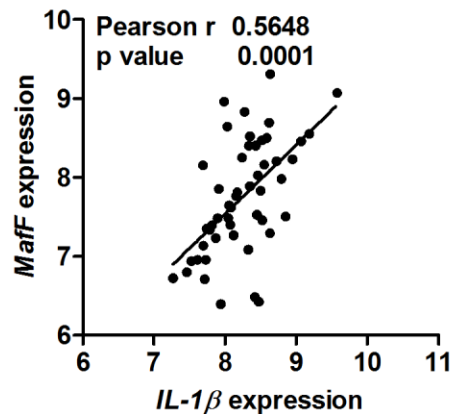**D**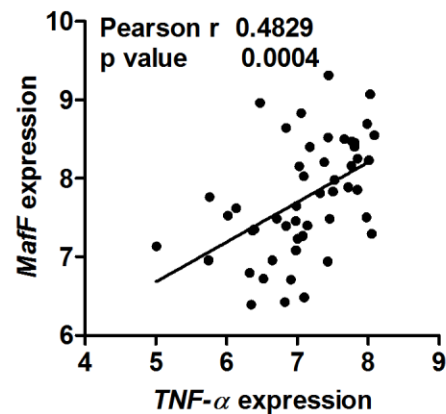**E**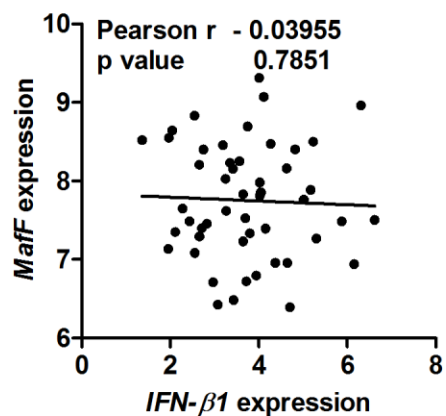**F**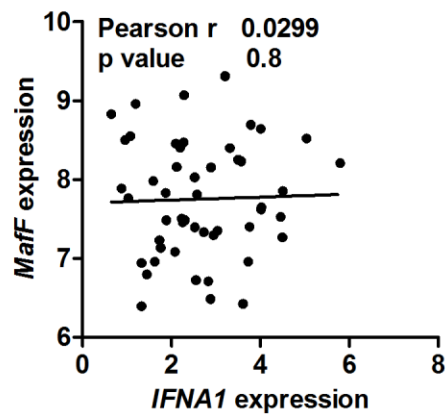**G**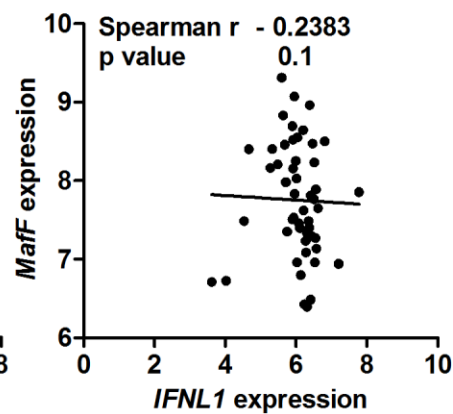**H**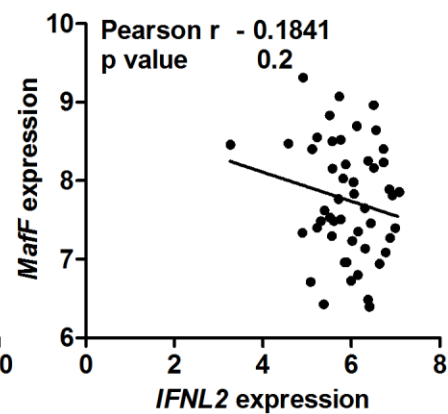

Source: https://www.biorxiv.org/content/biorxiv/early/2021/03/24/2020.07.29.227793.full.pdf
